# 1 **MiR-146a-dependent regulation of CD24/AKT/ $\beta$ -catenin axis drives stem** 2 **cell phenotype in oral cancer**

3 **Sangeeta Ghuwalewala<sup>1a\*</sup>, Dishari Ghatak<sup>1b\*</sup>, Sumit Das<sup>2c</sup>, Pijush Das<sup>1d</sup>, Ramesh Butti<sup>2e</sup> Mahadeo**  
4 **Gorain<sup>2f</sup>, Gopal C Kundu<sup>2g</sup> and Susanta Roychoudhury<sup>1,3#</sup>**

5 <sup>1</sup>Cancer Biology and Inflammatory Disorder Division, CSIR-Indian Institute of Chemical Biology, 4,  
6 Raja S.C. Mullick Road, Jadavpur, Kolkata-700032, India.

7 <sup>a</sup>[sangeetaghawalewala@gmail.com](mailto:sangeetaghawalewala@gmail.com), <sup>b</sup>[dishari18@gmail.com](mailto:dishari18@gmail.com), <sup>c</sup>[das.sumit13@gmail.com](mailto:das.sumit13@gmail.com),

8 <sup>d</sup>[topijush@gmail.com](mailto:topijush@gmail.com), <sup>e</sup>[rameshbutti@gmail.com](mailto:rameshbutti@gmail.com), <sup>f</sup>[mahadeo.gorain@gmail.com](mailto:mahadeo.gorain@gmail.com), <sup>g</sup>[kundu@nccs.res.in](mailto:kundu@nccs.res.in)

9 <sup>2</sup>Laboratory of Tumor Biology, Angiogenesis and Nanomedicine Research, National Centre for Cell  
10 Science (NCCS), Pune 411007, India.

11 <sup>3</sup>Division of Research, Saroj Gupta Cancer Centre and Research Institute, Mahatma Gandhi Road,  
12 Thakurpukur, Kolkata 700063, India

## 13 **#To whom correspondence should be addressed**

14 Susanta Roychoudhury, PhD, Saroj Gupta Cancer Centre and Research Institute, Mahatma Gandhi  
15 Road, Thakurpukur, Kolkata 700063, India, E-mail: [susantarc@gmail.com](mailto:sasantarc@gmail.com)

16 \*These authors contributed equally to this work.

17 **Running title:** MiR-146a regulate CSCs by targeting CD24

## 18 **Abstract**

19 Cancer stem cells (CSCs) are known to potentiate tumor initiation and maintenance in oral squamous  
20 cell carcinoma (OSCC). Increasing evidences suggest that CD44<sup>high</sup>CD24<sup>low</sup> population in OSCC  
21 exhibit CSC-like characteristics. The role of mi-RNAs in maintenance of oral CSCs has remained  
22 unclear. Here we report that CD44<sup>high</sup>CD24<sup>low</sup> population within OSCC cell lines and primary HNSCC

23 tumors have an elevated expression of miR-146a. Moreover, over-expression of miR-146a results in  
24 enhanced stemness phenotype by augmenting CD44<sup>high</sup>CD24<sup>low</sup> population. We demonstrate that miR-  
25 146a induces CSC property by stabilizing  $\beta$ -catenin with concomitant loss of E-cadherin and CD24.  
26 Interestingly, CD24 has been identified as a novel functional target of miR-146a and ectopic expression  
27 of CD24 abrogates miR-146a driven potential CSC phenotype. Mechanistic analysis reveals that higher  
28 CD24 levels inhibit AKT phosphorylation leading to  $\beta$ -catenin degradation in non-CSCs. We also  
29 validate that the miR-146a/CD24/AKT loop significantly alters tumorigenic ability *in vivo*.  
30 Furthermore, we confirmed that  $\beta$ -catenin trans-activates miR-146a, thereby forming a positive  
31 feedback loop contributing to stem cell maintenance. Collectively, our study demonstrates that miR-  
32 146a regulates CSC-driven properties in OSCC through CD24-AKT- $\beta$ -catenin axis.

33

34 **Keywords:** miR-146a,  $\beta$ -catenin, AKT, stemness, CD24, OSCC

35

## 36 **Introduction**

37 Oral Squamous Cell Carcinoma (OSCC) is the most prevalent form of head and neck cancers worldwide  
38 with more than 60% individuals diagnosed with advanced tumors<sup>1</sup>. It is known that cancer stem-like  
39 cells (CSC) leads to aggressive tumor behavior<sup>2</sup>. The oral tumor CSCs are also considered responsible  
40 for treatment failures, relapse and development of metastases<sup>3,4</sup>. Over the past decade, epigenetic re-  
41 programming has emerged as a crucial mechanism of regulating cancer stem cell dynamics<sup>5</sup>. Epigenetic  
42 regulatory mechanisms include DNA methylation, histone modifications and chromatin remodeling.  
43 They show robust effect upon cellular fate and stem cell potential<sup>6,7</sup>. MiRNAs, a small ncRNAs of 20-  
44 22 nucleotides, has recently gained considerable importance in epigenetic modulation of tumor<sup>8</sup>. De-  
45 regulation of miRNAs may have critical roles in disease development<sup>9</sup>. They can act either as oncogenes  
46 or as tumor-suppressors depending upon the specific genes targeted. In-fact miRNA associated  
47 signatures are now considered for cancer specific diagnostic and prognostic purposes<sup>10</sup>.

48 MiRNAs not only regulate primary cellular functions like proliferation, differentiation,  
49 migration and invasion, but are also directly or indirectly involved in CSC functions<sup>11-14</sup>. Most of this  
50 phenomenon are attributed to altered signaling pathways including cell surface markers, pluripotent  
51 transcription factors, chemo-resistance and epithelial-to-mesenchymal transition (EMT) markers<sup>15</sup>. Role  
52 of miR-34a, miR-145a and miR-200bc family in regulating CD44, Oct4, Sox2, KLF4, Bmi1, Zeb1/2  
53 and Notch1 has been well established<sup>16-19</sup>. Thus, by precisely regulating the CSC related genes, miRNAs  
54 themselves have emerged as inherent modulators of cancer stem cells. MiR-146a is predominantly an  
55 onco-miR, which directly targets *IRAK1*, *traf6*, and *numb* genes in OSCC and imparts tumorigenicity  
56<sup>20</sup>. Emerging evidence on miR-146a suggests that it directs the self-renewal process in colorectal cancer  
57 stem cells by regulating Snail- $\beta$ -catenin axis which also contributes to EMT<sup>21</sup>. High nuclear  
58 accumulation of  $\beta$ -catenin, along with lowering of E-cadherin is frequently associated with higher tumor  
59 grade and poor prognosis in various cancers<sup>22</sup>. Given the role of Wnt/ $\beta$ -catenin signaling in CSC  
60 maintenance and the miRNAs in regulating wnt pathway, understanding the step-wise regulation of its  
61 mediators is crucial<sup>23-25</sup>.

62 Our recent study has characterized CD44<sup>high</sup>CD24<sup>low</sup> cells as the potential CSC population in  
63 OSCC<sup>3</sup>. CD24, a small cell surface protein, was identified as a critical determinant of differentiation in  
64 hematopoietic cells and mammary epithelial cells<sup>26</sup>. Besides having role in adhesion, cadherin switching  
65 or migration, CD24 is involved in diverse signaling networks, thus promoting oncogenesis or  
66 regression<sup>27</sup>. Although role of CD44 is well established<sup>4</sup>, the significance of CD24 in determining  
67 stemness is less explored, particularly in oral CSCs. In this study, we show that miR-146a imparts  
68 CD44<sup>high</sup>CD24<sup>low</sup> status to OSCC cells merely by targeting CD24. Changes in  $\beta$ -catenin pools seemed  
69 to be an important event in altering the afore-mentioned phenotypes downstream of miR-146a through  
70 AKT pathway. We propose that miR-146a/CD24/AKT/ $\beta$ -catenin axis influences the stemness  
71 characteristics of CD44<sup>high</sup>CD24<sup>low</sup> population in oral cancer cells.

72

## 73 **Results**

74 **MiR-146a is over-expressed in CD44<sup>high</sup>CD24<sup>low</sup> population of OSCC cell lines and primary**  
75 **tumors**

76 To identify the cellular miRNAs regulating CSC phenotype of OSCC cells, we initially screened nine  
77 miRNAs that are aberrantly expressed in human cancers with their reported role in cancer stemness and  
78 EMT<sup>30-32</sup>. QRT-PCR data showed significant difference in the expression of miR-200b, miR-138, miR-  
79 34a, miR-21 and miR-146a between CD44<sup>high</sup>CD24<sup>low</sup> and CD44<sup>low</sup>CD24<sup>high</sup> population of SCC25 cells  
80 (Fig. 1a). Amongst them, we focused on miR-146a in view of its context dependent role in various  
81 cancers<sup>33-35</sup>. MiR-146a is consistently over-expressed in oral CSCs, therefore it was intriguing to explore  
82 its possible connection with stemness and the underlying mechanisms. Up-regulation of miR-146a in  
83 the CD44<sup>high</sup>CD24<sup>low</sup> population of SCC131 and SCC084 cell lines was also confirmed (Fig.1b).  
84 Further, miR-146a expression was also increased upon enrichment of isolated CSCs in the sphere  
85 forming culture conditions, suggesting its importance in determining oral CSC property (Fig. 1c).  
86 Increased miR-146a expression has been reported to predict poor survival of OSCC patients<sup>20</sup>. Our  
87 analyses in TCGA Head and Neck Squamous cell Carcinoma (HNSCC) patient's cohort<sup>36</sup>, showed  
88 increased miR-146a expression in patients with CD44<sup>high</sup>CD24<sup>low</sup> signature compared to those with  
89 CD44<sup>low</sup>CD24<sup>high</sup> profile (Fig. 1d). While there was not much difference in the histological stage of the  
90 tumors across the two categories, most of the CD44<sup>low</sup>CD24<sup>high</sup> tumors were free of lymph node  
91 metastasis (Figure S1a, Supplementary file 1). Moreover, miR-146a expression of the node positive  
92 patients was relatively higher than that of the node negative ones, although not statistically significant  
93 (Figure S1b). Together, our data suggests high miR-146a expression as a critical determinant of CSC  
94 phenotype in oral tumors.

95 **Ectopic expression of miR-146a induces CSC characteristics**

96 We next investigated whether ectopic miR-146a affect CSC markers and found a significant increase  
97 in the relative proportion of CD44<sup>high</sup>CD24<sup>low</sup> population in SCC131 cells (Fig.2a). Similar results were  
98 also obtained with SCC036, SCC084 and SCC25 cells, respectively (Figure S2a). Characteristic sphere  
99 forming ability of miR-146a expressing SCC131 and SCC036 cells were also markedly enhanced (Fig.

100 2b). Concomitantly, ectopic expression of miR-146a led to the increased expression of intracellular  
101 stem cell markers such as Oct4, Sox2 and C-myc and loss of Involucrin (Fig.2c). Also, we observed a  
102 pronounced decrease in CD24 protein levels upon ectopic miR-146a expression in SCC036, SCC131  
103 and SCC084 cells (Fig. 2c). However, in SCC131 cells the levels of Oct4 and Involucrin did not show  
104 a dose dependent change upon miR-146a over-expression, probably due to high endogenous miR-146a  
105 in this cell line (Fig. 2c and Figure S2b). Loss of these markers upon knockdown of miR-146a was also  
106 evident in SCC131 and SCC25 cells (Figure S2c). Expression of miR-146a transcripts was validated  
107 by qRT-PCR (Figure S2d). Transfection of miR-146a containing mutated seed sequence, however, did  
108 not alter the levels of stem-related proteins in a statistically significant manner (Fig. 2d). These results  
109 demonstrate that miR-146a contributes to enrichment of CSCs in OSCC through increased expression  
110 of stem cell markers.

#### 111 **MiR-146a activates Wnt/ $\beta$ -catenin pathway and promotes EMT in oral CSCs**

112 The CSC population is sustained by niche signalling, similar to that of normal stem cells. These include  
113 Wnt, Notch and Hedgehog pathways that are often involved in maintaining its self-renewal potential<sup>37</sup>.  
114 Accordingly, we observed increased expression of  $\beta$ -catenin and Cleaved Notch1 in CD44<sup>high</sup>CD24<sup>low</sup>  
115 population of SCC25 and SCC131 cells (Figure S3a, b). While significantly depleted in CD24<sup>high</sup> cells,  
116  $\beta$ -catenin levels were also higher in CD24<sup>low</sup> population of SCC084 cells which correlated well with the  
117 expression of stemness markers in these cells (Fig.3a). To specifically envisage the role of CD24, we  
118 now compared the CD44<sup>high</sup>CD24<sup>low</sup> population with the CD44<sup>high</sup>CD24<sup>high</sup> cells only. Interestingly we  
119 detected nuclear localization of  $\beta$ -catenin in the CD44<sup>high</sup>CD24<sup>low</sup> population of SCC131 cells, whereas  
120 it remained membrane bound in CD44<sup>high</sup>CD24<sup>high</sup> cells (Fig.3b). Transcriptional activity of  $\beta$ -catenin  
121 was indicated by the relative wnt reporter activity in the respective cell populations (Figure S3c).  
122 Interestingly, upon stable knockdown of  $\beta$ -catenin, not only the stem cell markers were reduced but  
123 also a modest increase in CD24 expression was observed (Figure S3d). These results suggest a possible  
124 cross talk between CD24 and  $\beta$ -catenin in conferring stemness and EMT to these cells.

125 The clue that  $\beta$ -catenin level might influence stemness in OSCC cells led us to investigate whether miR-  
126 146a regulates  $\beta$ -catenin. Indeed, over-expression of miR-146a lead to the dose dependent increment in  
127  $\beta$ -catenin levels with concordant decrease in E-cadherin (Fig.3c). It is known that miR-146a targets the  
128 3'UTR of Numb, a protein that promotes lysosomal degradation of  $\beta$ -catenin and Cleaved Notch1<sup>38</sup>. We  
129 indeed, confirmed reduced levels of Numb upon miR-146a over-expression along with stabilization of  
130 Cleaved Notch1 (Figure S3e). Conversely, inhibition of miR-146a activity lead to  $\beta$ -catenin degradation  
131 along with the loss of Oct4 as expected (Fig.3d). Notably, we did not observe these changes upon mutant  
132 miR-146a over-expression (Figure S3f). To emphasize the contribution of  $\beta$ -catenin in miR-146a  
133 induced stemness, we transfected miR-146a in  $\beta$ -catenin shRNA expressing cells and found no change  
134 in expression of CSC markers (Figure S3g) as compared to that of non-silencing controls. Strikingly,  
135 the ability of anchorage independent growth induced by miR-146a was also dependent on the expression  
136 of  $\beta$ -catenin (Figure S3h) suggesting its tumorigenic role in OSCC.

137 To obtain clinical relationships among miR-146a, CD24 and  $\beta$ -catenin, we first checked the correlation  
138 between miR-146a and CD24 expression across the NCI-60 cell lines and found it to be significantly  
139 negatively correlated (Fig.3e). Moreover, examination of CD44<sup>high</sup> HNSCC tumors from TCGA dataset  
140 revealed a positive correlation between miR-146a expression and  $\beta$ -catenin/CD24 ratio (Fig. 3f).  
141 Further, the observed down-regulation of E-cadherin upon miR-146a expression prompted us to address  
142 the miR-146a driven EMT phenomenon in OSCC. Indeed, miR-146a was found to be significantly  
143 over-expressed in the mesenchymal (MS) cell lines showing higher CD44 and lower CD24 expression<sup>3</sup>,  
144 compared to the epithelial (EP) cell lines of the NCI-60 panel<sup>29</sup>(Fig.3g). In addition, the miR-146a  
145 expression in TCGA tumor samples was negatively correlated with the E-cadherin to Vimentin ratio  
146 (Fig.3h). Based on these observations, we propose that miR-146a induced stemness and EMT in OSCC  
147 is mediated through lowering of CD24 followed by activation of  $\beta$ -catenin.

#### 148 **MiR-146a targets CD24 in oral CSCs**

149 We considered CD24 as a putative target of miR-146a through which it might impart stemness in OSCC.  
150 Although, *in silico* identification of miRNA targets using the prediction software did not reveal CD24

151 as the probable target, we did find matching of miR-146a seed sequence in the CD24 3'UTR in  
152 miRANDA (Supplementary file 2). Despite one mismatch, the maximum free energy of miRNA-  
153 mRNA binding was favourable enough for hybridization and targeting (Figure S4a). In Fig. 2c, we had  
154 already examined that CD24 expression was significantly depleted upon miR-146a transfection in a  
155 dose dependent manner in SCC036, SCC131 and SCC084 cells. Alongside, it was up-regulated upon  
156 inhibition of miR-146a in SCC131 cells (Fig.4a). We also observed remarkable changes in CD24  
157 transcripts in both SCC131 and SCC084 upon modulation of miR-146a (Fig.4b,c). To further confirm  
158 that CD24 is a direct target of miR-146a, we co-transfected luciferase reporter vector containing the  
159 3'UTR fragment of CD24 gene with either miR-146a expressing vector or anti-miR-146a in SCC131  
160 cells. As shown in Fig.4d, e and f, miR-146a over-expression reduced the luciferase activity of CD24  
161 3'UTR, while miR-146a inhibitor elevated the same. On the contrary, transfection with mutated mir-  
162 146a did not alter the CD24 3'UTR luciferase activity significantly (Fig.4d, Figure S4b). Thus, this data  
163 experimentally validates the ability of miR-146a to directly target CD24 gene by binding to its 3'UTR.  
164 This justifies the involvement of miR-146a in negative regulation of CD24 expression in oral cancer  
165 stem cells.

#### 166 **Mir-146a stabilizes $\beta$ -catenin by down-regulating CD24**

167 To get a mechanistic insight into the miR-146a mediated  $\beta$ -catenin stabilization, CD24 was over-  
168 expressed in miR-146a over-expressing cells. Interestingly, CD24 not only abolished the stemness  
169 markers but also the expression of  $\beta$ -catenin and CD44 (Fig.5a and FigureS5a). This indicated that  
170 down-regulation of CD24 by miR-146a was instrumental in maintaining the high  $\beta$ -catenin levels and  
171 consequently the downstream stemness phenotype. This was further exemplified as CD24 over-  
172 expression alone could lead to degradation of  $\beta$ -catenin protein and the associated stem cell markers,  
173 while the siRNA mediated knockdown of CD24 showed an opposite effect (Fig.5b,c). Wnt target genes  
174 such as *C-myc*, *CD44*, *CCND1* were detected at conspicuous levels upon CD24 knockdown, whereas  
175 significantly depleted upon CD24 over-expression in cells expressing miR-146a (Figure S5b, c). These  
176 observations suggest an inverse correlation between CD24 and  $\beta$ -catenin signalling in OSCC cells. It  
177 was further confirmed by the inhibition of miR-146a-induced  $\beta$ -catenin nuclear mobilization upon

178 ectopic expression of CD24 (Figure S5d). In addition, miR-146a driven increased wnt reporter activity  
179 was found to be reduced upon CD24 over-expression (Fig.S5e). To further investigate its downstream  
180 effect on stemness phenotype, we performed an *in vitro* sphere-formation assay. We observed a  
181 considerably defective spheroid forming ability of miR-146a transfected cells in the presence of CD24  
182 (Fig.S5f). Together, these observations suggest the possible contribution of CD24 in regulating Wnt  
183 pathway through  $\beta$ -catenin, thereby affecting CSC-like traits.

#### 184 **Involvement of pAKT in CD24 mediated degradation of $\beta$ -catenin**

185 Next, to elucidate the cause of  $\beta$ -catenin reduction in the presence of CD24, we treated SCC084 and  
186 SCC036 cells with MG132, and found  $\beta$ -catenin levels returned to that of un-transfected controls  
187 (Fig.5d). This confirms that unlike Numb, CD24 degrades  $\beta$ -catenin in a proteasomally dependent  
188 manner. The restored  $\beta$ -catenin also re-established the expression of stem cell marker Oct4 irrespective  
189 of CD24 over-expression in both SCC036 and SCC084 cells (Fig.5d). E-cadherin levels, however,  
190 remained high in the presence of CD24, irrespective of  $\beta$ -catenin stability (Fig.5d). Notably, CD24 did  
191 not affect Numb expression, corroborating the independent participation of CD24 in regulating  $\beta$ -  
192 catenin (Figure S6a). To gain mechanistic insights into the CD24 mediated  $\beta$ -catenin degradation, we  
193 speculated that CD24 might sequester  $\beta$ -catenin into the membrane bound lipid rafts analogous to that  
194 of E-cadherin<sup>39</sup>. To address this, we checked the CD24 and  $\beta$ -catenin interaction at protein level but did  
195 not find them in co-immunoprecipitation (Figure S6b). Alternatively, CD24 may also lead to  $\beta$ -catenin  
196 destabilization via AKT-GSK-3 $\beta$  pathway<sup>40,41</sup>. Towards this, we did find that CD24 over-expression  
197 rescued the miR-146a mediated increase in pAKT (Ser 473) activity (Fig.5e). Here it was appreciably  
198 noted that over-expression of CD24 lead to the down-regulation of total AKT protein itself and thereby  
199 phospho-AKT (Figure S6c), although it remained stable during MG132 treatment (Figure S6d). On the  
200 contrary, knockdown of CD24 in SCC036 increased pAKT and  $\beta$ -catenin levels (Fig.5f). Moreover,  
201 pAKT was found to be accumulated in the CD44<sup>high</sup>CD24<sup>low</sup> fraction of SCC25 cells thereby indicating  
202 its prior involvement in stemness (Figure S6e). In addition, we observed significant depletion of  $\beta$ -  
203 catenin upon treatment with pAKT inhibitor (LY294002) which again confirmed its regulation by miR-  
204 146a-CD24-pAKT loop (Fig.5g).



205 These cell line related observations was further validated using mouse xenograft model. To check the  
206 effect of miR-146a on *in-vivo* tumor formation, SCC084 cells harboring either an empty vector  
207 (SCC084/EV) or stably expressing miR-146a (SCC084/miR-146a), were generated and the over-  
208 expression of miR-146a with subsequent downregulation of CD24 was confirmed by both qRT-PCR  
209 and western blot analysis (Fig. S7a, b and c). SCC084/EV and SCC084/miR-146a cells were then  
210 introduced in the right and left flanks of NOD/SCID mice respectively and allowed to form  
211 subcutaneous tumor (Fig S7d and e). A significant increase in tumor volume and tumor weight was  
212 observed in SCC084 xenografts stably over-expressing miR-146a suggesting enhanced stemness  
213 potential of these cells. (Fig 6a and b). Further, to explore the effect of AKT signaling on miR-146a  
214 induced tumor, mice with palpable tumors generated from SCC084/EV and SCC084/miR-146a cells  
215 were treated with quercetin, a known PI3K/AKT signalling pathway blocker <sup>42</sup> (Fig S7d and e). As  
216 expected, the tumor formation ability of miR-146a cells was significantly attenuated *in vivo* upon  
217 administration of quercetin at regular intervals (Fig 6a and b). While there was no effect of quercetin  
218 on miR-146a and CD24 levels,  $\beta$ -catenin over-expression in miR-146a tumors was compromised in  
219 presence of quercetin (Fig S7f, g). In order to investigate the effect of CD24 upon the acquired stemness  
220 of miR-146a expressing cancer cells *in vivo*, we examined xenograft tumors generated from  
221 SCC084/miR-146a cells harboring CD24 expression construct (Fig S7a, b, c, h and i). Notably,  
222 compared to the control tumors, volume and weight of CD24-expressing SCC084/miR-146a tumors were  
223 not significantly (p-value = 0.7360) altered (Fig 6c and d) suggesting loss of miR-146a driven stemness.  
224 Xenograft tumor subjected to qRT-PCR analysis confirms the overexpression of miR-146a and CD24  
225 in these cells while  $\beta$ -catenin is down-regulated (Fig. S7j and k). Collectively, these results indicate that  
226 CD24/AKT/ $\beta$ -catenin axis plays an important role in miR-146a regulated CSC-mediated tumor growth  
227 *in-vivo*. This was further supported by the soft agar tumorigenesis assays, which clearly showed that  
228 CD24 over-expression or AKT inhibition, both rescued the miR-146a induced colony formation in  
229 OSCC cells (Fig. S8a and b). The above results strongly prove CD24 as a negative regulator of  $\beta$ -  
230 catenin/Wnt signaling pathway through AKT inhibition.

231  **$\beta$ -catenin transactivates miR-146a expression contributing to positive feedback loop**

232 The upstream regulators of miRNAs have always been involved in feedback regulatory mechanisms  
233 and are not much investigated. Analysis of miR-146a promoter has revealed the binding sites for NF-  
234  $\kappa$ B, TCF4/ $\beta$ -catenin and STAT3, suggesting possible transcriptional modulation<sup>21,43,44</sup>. $\beta$ -catenin  
235 enhances stemness features by driving the intracellular levels of c-myc and other yamanaka factors  
236 (Fig.7a). This apparently contributes to the enhanced tumorigenic properties in response to high miR-  
237 146a levels. Interestingly, we found that  $\beta$ -catenin also promotes the expression of miR-146a, which  
238 might augment the stemness acquiring ability of the cancer cells (Fig.7a). However, expression of miR-  
239 146a was significantly reduced in the presence of both dnTCF4 and Numb which inhibits  $\beta$ -catenin  
240 binding to the promoter and degrades it respectively (Fig.7b). Change in miR-146a promoter activity  
241 under similar conditions suggests that  $\beta$ -catenin is involved in trans-activation of miR-146a promoter  
242 (Figure S9a). We hypothesize that  $\beta$ -catenin mediated induction of miR-146a contributes to  $\beta$ -catenin  
243 mediated CD24 reduction (Fig.7a). ChIP-qPCR assay confirmed that  $\beta$ -catenin binds to miR-146a  
244 promoter *in vivo* (Fig.7c). Further, the recruitment of  $\beta$ -catenin was found to be significantly enhanced  
245 in absence of CD24 (Fig.7c). Moreover, miR-146a promoter activity was significantly increased in  
246 presence of miR-146a, while reduced upon ectopic expression of CD24 (Fig. 7d). However, the  
247 constructs with either mutated or deleted TCF4 binding sites showed no significant difference in  
248 promoter activity (Figure S9b). This may be due to the alternating levels of  $\beta$ -catenin which shoots up  
249 in miR-146a over-expression condition and gets depleted in presence of CD24. Transient ChIP assays  
250 with the same luciferase constructs also confirmed that  $\beta$ -catenin indeed binds to miR-146a promoter,  
251 which is impeded upon CD24 over-expression (Fig. 7e). These data positively confirm the feedback  
252 activation loop by  $\beta$ -catenin that further trans-activates miR-146a expression to shift the equilibrium  
253 towards CSC maintenance.

## 254 Discussion

255 Oral cancer progression has been largely attributed to both genetic and epigenetic heterogeneity.  
256 Tumorigenic cells can arise from the non-tumorigenic cancer cells owing to spontaneous conversion to  
257 a stem-like state<sup>45</sup>. The origin and plasticity of such cells, called cancer stem cells (CSCs), have always

258 been a matter of debate. Nevertheless, CSCs are known to be responsible for chemo-resistance, tumor  
259 recurrence and metastasis. Detail molecular characterization of CSCs is therefore of paramount  
260 importance for eliminating them from its roots. CD24 has been routinely used with CD44 for the  
261 prospective isolation of CSCs in colorectal, prostate and breast cancers <sup>46</sup>. Given the critical role of  
262 cellular miRNAs in regulating CSC characteristics, current anticancer therapies have provided an  
263 important avenue towards exploiting them for effective cellular targeting<sup>47</sup>. Targeting of CD44 by  
264 miRNAs in NSCLC, prostate and ovarian cancer has been previously demonstrated to attenuate  
265 stemness<sup>17,48,49</sup>. However, miRNA mediated regulation of CD24 remains to be determined.

266 Consistent with its oncogenic functions, miR-146a promotes symmetric division of colorectal  
267 CSCs, thereby promoting stemness <sup>21</sup>. The miRNA is also involved in development of melanoma by  
268 activating Notch1 signaling leading to drug resistance <sup>50</sup>. However, little is known about its role in  
269 regulating expression of CSC-related CD markers in oral cancer. In the present study, we detected  
270 significantly higher expression of miR-146a in CD44<sup>high</sup>CD24<sup>low</sup> population of OSCC cell lines as well  
271 as in tumor specimens. We therefore speculated whether miR-146a expression maintains CSC traits or  
272 miR-146a accumulation is a consequence of induced stemness. Notably, ectopic expression of miR-  
273 146a induce CSC-phenotype i.e. CD44<sup>high</sup>CD24<sup>low</sup> population together with increased  $\beta$ -catenin activity  
274 in OSCC cell lines. CD44 is a well-known transcriptional target of  $\beta$ -catenin along with C-myc and  
275 CCND1<sup>21</sup>, which clearly indicates a molecular link with miR-146a induced CD44 expression. However  
276 the effect of miR-146a upon CD24 expression under these conditions was particularly intriguing.  
277 Hence, we examined whether CD24 is a direct target of miR-146a and experimentally confirmed that  
278 miR-146a binds to the 3'UTR of CD24 thereby repressing it post-transcriptionally. Loss of E-cadherin  
279 upon miR-146a over-expression and positive correlation with the mesenchymal marker vimentin was  
280 also evident. Hence, in addition to its novel role in acquiring stemness, our results re-confirmed miR-  
281 146a as a key regulator of EMT<sup>51</sup>.

282 Wnt/ $\beta$ -catenin has shown great potential for CSC-targeting in cancer<sup>37</sup>. Our study shows that  
283 CSC characteristics in OSCC is attributed to the elevated  $\beta$ -catenin along with depleted CD24. The  
284 anticipation that CD24 leads to proteasomal degradation of  $\beta$ -catenin was found to be true and

285 apparently it also abolished the  $\beta$ -catenin mediated stemness. This is a novel functional interaction  
286 through which miR-146a regulates  $\beta$ -catenin in oral cancer cells. Our study, thus points towards the  
287 tumor-suppressor functions of CD24, supporting our previous observation of reduced CD24 expression  
288 in oral tumors compared to the normal tissue (our own data)<sup>3</sup>. Although growth inhibition was achieved  
289 by knocking down CD24 in colorectal and pancreatic cancer<sup>52</sup>, no such effects were observed in oral  
290 cancer. Perhaps the variable cell-type specific distribution pattern underlies the paradoxical role of  
291 CD24 in oral cancer<sup>53</sup>. Activated PI3K-AKT pathway is one of the primary events in carcinogenesis<sup>54</sup>.  
292 Its contribution to stem cell self-renewal and proliferation (both normal and cancer) has also been  
293 extensively studied<sup>55</sup>. Receptor Tyrosine Kinase (RTKs) mediated growth signals (through EGF, IL-6,  
294 TGF- $\beta$  etc.) impinges upon AKT through activation of the PI3K kinase<sup>56</sup>. Stability of phospho-AKT  
295 and other kinases play key role in maintaining cancer stem cells of chronic myeloid leukemia (CML),  
296 NSCLC, breast, prostate and colorectal cancer<sup>55</sup>. Further, signaling pathways like WNT are often linked  
297 with AKT activation that eventually contribute to expression of stem cells-related factors, chemo-  
298 resistance genes, and CSC markers<sup>54,57</sup>. Here we show that CD24, the cell surface CSC marker lie  
299 upstream of AKT protein, similar to that of TWIST and FOXO transcription factors which is also known  
300 to inhibit CD24<sup>40,58-60</sup>. However, the precise mechanism by which expression/stability of AKT protein  
301 is regulated by CD24 is unknown. CD24 has been shown to possibly modulate phospho-AKT levels<sup>61</sup>,  
302 which might affect its downstream targets such as GSK-3 $\beta$ <sup>41</sup>. Activated GSK-3 $\beta$  mediates  
303 phosphorylation and ubiquitination of  $\beta$ -catenin, thereby leading to its degradation<sup>41</sup>. Therefore, it was  
304 incumbent on us to ask whether CD24 induce AKT and subsequently affect  $\beta$ -catenin stability in miR-  
305 146a induced oral CSCs. Indeed, MG132 treatment was found to re-stabilize  $\beta$ -catenin by relieving  
306 pAKT inhibition in cells over-expressing CD24. Moreover, direct AKT inhibition in the miR-146a  
307 transfected cells depleted  $\beta$ -catenin, irrespective of CD24 level suggesting AKT is downstream of  
308 CD24. Thus, we logically elucidated the molecular mechanism underlying CD24 mediated  $\beta$ -catenin  
309 degradation in oral cancer cells. We have specifically shown that CD24 over-expression decrease levels  
310 of phospho-AKT leading to  $\beta$ -catenin instability. The role of miR-146a/CD24/AKT/ $\beta$ -catenin axis in

311 maintaining the oral cancer stem cell populations is thus mechanistically evident. Studies from in-vivo  
312 tumor model system also confirms that these molecular mechanisms directly affect tumorigenesis.

313 Further, the recruitment of  $\beta$ -catenin onto miR-146a promoter was found to be negatively  
314 regulated by CD24 which might contribute to the fine tuning of stemness. These results clearly establish  
315 a cross-regulatory network between miR-146a and  $\beta$ -catenin, governed by a stem-related marker, CD24  
316 in OSCC cells. Our study thus provides strong evidences which suggest that miR-146a promotes CSC  
317 characteristics of oral cancer cells by down-regulating CD24. Repression of CD24 leads to AKT  
318 stabilization followed by activation of Wnt/ $\beta$ -catenin signaling. Based on our observation, we propose  
319 a model wherein, AKT activity is an important determinant of miR-146a dependent  $\beta$ -catenin signaling  
320 (Fig.8). It should be noted, however, that  $\beta$ -catenin mediated CSC induction might be due to the  
321 induction of miR-146a expression or vice-versa. Taken together, the present study highlights a novel  
322 mechanism of miR-146a mediated self-renewal capacity of Oral CSCs that may have a prognostic or  
323 therapeutic value in oral cancer.

## 324 **Materials and methods**

### 325 **Cell culture and transfection**

326 Various human Oral Squamous Cell Carcinoma (OSCC) cell lines SCC131, SCC084 and SCC036 were  
327 obtained from Dr. Sussane Gollin, University of Pittsburgh. These cells were maintained in 5% CO<sub>2</sub> at  
328 37°C in DMEM medium supplemented with 10% fetal bovine serum (FBS) and antibiotics (Life  
329 Technologies, Thermo Fisher Scientific Inc., MA, USA). The ATCC (American Type Culture  
330 Collection) oral cancer cell line, SCC25 was cultured in complete DMEM-F12 medium and 400ng/ml  
331 Hydrocortisone (Sigma Aldrich) under similar conditions. For transfection, Lipofectamine<sup>TM</sup> 2000  
332 (Invitrogen) was used in serum free medium. Transfected cells were harvested after 48 hrs or 72 hrs for  
333 over-expression or knockdown studies respectively.

### 334 **Plasmid constructs, miRNA inhibitors and siRNAs**

335 We obtained mir-146a and mir-146a SDM expressing pU61 construct from Dr. Nitai. P. Bhattacharjee  
336 (SINP, Kolkata). The TOP-flash/FOP-flash reporters, dnTCF4, Numb, and pcDNA3.1 empty vector  
337 along with miR-146a promoter LucA, LucB and mLucA Luciferase constructs were kind gifts from  
338 Muh-Hwa Yang (Taiwan). Human CTNNB1 expression plasmid deposited by Eric Fearon was  
339 purchased from Addgene (#16828). CD24 cDNA cloned into the pCDNA3.1 vector and the full-length  
340 3'-UTR of CD24 cloned into the HindIII site of pMIR (Ambion) were obtained from Heike Allgayer  
341 (University of Heidelberg, Germany). Anti-miR-146a (AM-34a) (ID: AM11030) were obtained from  
342 Ambion, CD24 siRNA (a pool of 3 target specific siRNAs) and Scramble siRNA from Santa Cruz.  
343 CTNNB1 shRNA constructs (Addgene # 18803) were provided by Dr. Mrinal Kanti Ghosh, IICB,  
344 Kolkata. MiR-146a over-expression cassette was sub-cloned from pU61 into the pLKO.1 TRC vector  
345 (Addgene plasmid # 10878). Packaging plasmids psPAX2 (Addgene plasmid # 12260) and pMD2.G  
346 (Didier Trono, Addgene plasmid# 12259) was used to generate the miR-146a over-expression lentiviral  
347 particles and target cells were infected following the manufacturer's protocol. Stable transduced cells  
348 were selected by puromycin (Gibco) and over-expression efficiencies were verified by qRT-PCR and  
349 western blotting. CD24 was co-transfected and clones were selected by G418.

### 350 **Quantitative Real Time PCR**

351 TRIzol (Invitrogen, Thermo Fisher Scientific Inc., MA USA) method was used for isolation of total  
352 RNA as per manufacturer's instructions. 250 ng of RNA were converted to cDNAs using stem-loop  
353 primers specific for reverse transcription of individual miRNAs<sup>28</sup>. MiRNA cDNAs were amplified with  
354 forward primers specific for individual miRNAs and a URP, with U6 snRNA as an endogenous  
355 reference control. For mRNA expression changes, protocol was similar to that described previously<sup>3</sup>.  
356 SYBR Green master mix (Roche, USA) was used to carry out qRT-PCR in the 7500 Fast Real-Time  
357 PCR instrument (Applied Biosystems, USA). Fold change values ( $2^{-\Delta\Delta CT}$ ) were calculated from average  
358 of three independent experiments. Primer sequences of genes, miRNA forward and loop primers are  
359 listed in Supplementary File 3.

### 360 **Analysis of TCGA and NCI-60 datasets**

361 RNA and miRNA-seq data were acquired for a total of 292 HNSCC tumor specimens from TCGA (The  
362 Cancer Genome Atlas) data portal (<https://tcga-data.nci.nih.gov/tcga/>). We first grouped top 25% of  
363 CD44 high and low expressing tumors and then further sub-grouped 25% of these tumors based on  
364 CD24 expression (Supplementary File 1). These were designated as CD44<sup>high</sup>CD24<sup>low</sup> and  
365 CD44<sup>low</sup>CD24<sup>high</sup>, wherein we checked the differential expression of miR-146a and calculated statistical  
366 significance using R Limma Package. Node status of these patients was also correlated with miR-146a  
367 expression using GraphPad Prism5 software. NCI-60 miRNA expression dataset (GEO accession  
368 number GSE26375) was analyzed to compare the miR-146a expression between the epithelial and  
369 mesenchymal groups as classified earlier<sup>29</sup> using Mann Whitney's u test.

### 370 **Flow cytometry**

371 Briefly, 48 hours post transfection of miR-146a, approximately  $1 \times 10^6$  cells were harvested in 1X PBS  
372 consisting of 1% FBS and 0.02% sodium azide. CD44-PE and CD24-FITC (BD Pharmingen)  
373 conjugated antibodies were used for double staining. Cells were then washed and subjected to flow  
374 cytometry on the BD LSRFortessa and analysis was done using BD FACSDiva 6.2 software. Debris  
375 and clumps were excluded and the size gate was decided using forward and side scatter analysis of  
376 unstained cells. Isotype controls were included for the non-specific staining.

### 377 **Sphere forming assay**

378 MiR-146a transfected cells were cultured overnight. Next day, cells were trypsinised and a single cell  
379 suspension was ensured. Low attachment 6-well plate were used for re-seeding the cells at a density  
380 of 5000 cells/ml in DMEM-F-12 serum free media containing 1% B27 supplement, 20 ng/ml of EGF  
381 and 20 ng/ml of bFGF (Invitrogen). 500  $\mu$ l of media was added every 2-3 days. Photographs of the  
382 spheres were taken under inverted microscope (Leica TCS SP8; Germany) with 20X magnification at  
383 7-14 days. All experiments were done in biological triplicates.

### 384 **Immuno-fluorescence**

385 Sorted populations of SCC131 were grown on cover-slips overnight and then fixed with chilled aceto-  
386 methanol (1:1). 0.03% Saponin (Calbiochem, Germany) was used for permeabilization followed by  
387 blocking with 3% BSA. Rabbit monoclonal antibody against  $\beta$ -catenin and mouse monoclonal antibody  
388 against CD24, CD44 (Cell signaling technology) were added at a dilution of 1:200 and incubated  
389 overnight. It was then probed with anti-rabbit-FITC and anti-mouse Alexa-Flour 633nm conjugated  
390 secondary antibody (molecular probes) and counter stained with DAPI (Invitrogen) for nuclear staining.  
391 Images were taken under a confocal microscope (Andor Spinning Disc Confocal Microscope, Andor  
392 Technology, Belfast, Ireland) at 60X magnification.

### 393 **Western blotting**

394 Cell lysates were prepared after 48 hrs of transfection in NP-40 lysis buffer (Invitrogen) and protease  
395 inhibitor cocktail (1X) was added for enhanced protein stability. Bradford reagent (Sigma) was used to  
396 determine concentrations and equivalent amounts of denatured protein samples were subjected to SDS-  
397 PAGE (8%-10%), separated by size and transferred on to PVDF membrane (Millipore, Billerica, USA).  
398 Antibodies used for immuno-blotting were polyclonal  $\beta$ -catenin, E-cadherin, CD44 and CD24,  
399 Involucrin (Santa Cruz Biotechnology, CA, USA), polyclonal Oct4 and Sox2 (Abcam), polyclonal C-  
400 myc, Akt and phospho-Akt (Cell Signaling Technology, USA). Bands were obtained using ECL  
401 substrate (Thermo Scientific, USA) from HRP-conjugated secondary antibody (Sigma). Proteasome  
402 Inhibitor MG132 (Calbiochem) and Akt inhibitor LY294002 (Cell signaling Technology, USA) were  
403 both used at a concentration of 50  $\mu$ M. Transfected cells were treated for 4 hours before harvesting.  
404 Band intensities of each protein were analyzed by ImageJ to obtain densitometric values for their  
405 quantification. These were normalized to  $\beta$ -actin for individual experimental sets and fold change  
406 calculated. All the histograms were expressed as means  $\pm$  S.D. of three different experiments and p  
407 values computed in GraphPad Prism 5 (Student's two tailed t test).

### 408 ***In vivo* tumor xenograft experiments**

409 Animal experiments were performed following guidelines of the institutional animal ethics committee  
410 of National Centre for Cell Science, Pune. All the animals were issued under the project



411 IAEC/2012/B183. To investigate the effect of miR-146a overexpression on Oral squamous cell  
412 carcinoma (OSCC) growth *in vivo*,  $3 \times 10^6$  empty vector- and microRNA overexpression construct-  
413 containing SCC084 cells were injected subcutaneously into the dorsal flanks of eight NOD/SCID male  
414 mice (18 weeks old) on left and right side respectively. When palpable tumors could be seen the mice  
415 were segregated into groups of four each. Mice in one of the groups were injected with 25 mg/kg of  
416 body weight of Quercetin (Sigma) on every alternate day for a period of 15 days. The experiment was  
417 terminated when the average miR-146a over-expressing SCC084 tumor volumes in the group which  
418 received no quercetin reached about  $1200 \text{ mm}^3$ . At the termination of the experiment, the animals were  
419 sacrificed by  $\text{CO}_2$  asphyxiation and the tumors were collected for further analysis. Tumor diameters  
420 were measured each time the Quercetin was injected and at the termination of the experiment using  
421 digital Vernier Caliper. Excised tumor tissues were weighed and then stored in RNAlater solution  
422 (ThermoFisher Scientific) in  $-20^\circ\text{C}$  freezer. Tumor volumes were determined using the following  
423 formula:  $\pi/6[(d1 \times d2)^{3/2}]$ ; where d1 and d2 are two different diameters of a tumor. In another experiment,  
424 to investigate effect of simultaneous overexpression of miR-146a and CD24 on OSCC growth *in vivo*,  
425  $3 \times 10^6$  empty vector- and miR-146a and CD24 overexpression constructs-containing OSCC-084 cells  
426 were injected subcutaneously into the dorsal flanks of four NOD/SCID male mice (15 weeks old) on  
427 left and right side respectively. Tumors volumes were measured when palpable growth could be  
428 observed. The experiment was terminated when tumor volumes reached  $1300 \text{ mm}^3$ . The animals were  
429 euthanized by  $\text{CO}_2$  asphyxiation and the tumors were collected. Tumor tissues were processed as  
430 described previously for the other experiment.

### 431 **Reporter assays**

432 Cells seeded in 24 well plates were co-transfected with miR-146a OE plasmid and either CD24 3'UTR  
433 or miR-146a promoter luciferase construct using Lipofectamine<sup>TM</sup> 2000 (Invitrogen). The TOP-Flash  
434 and FOP-Flash reporters were also used under similar conditions. Promega dual luciferase assay system  
435 was performed according to the manufacturer's protocol. After 48 hr of transfection, medium was  
436 washed off with 1x PBS and cells were lysed with Passive Lysis Buffer (Promega) and luminescence  
437 was measured in Promega Glomax 20/20 luminometer. The luminescence values were transfection

438 normalized with the internal control pRL-TK (50 ng, Renilla Luciferase; Promega). Experiments were  
439 performed with three biological replicates.

#### 440 **Chromatin immunoprecipitation**

441 Cells seeded in 10cm dishes were transfected. After 48hrs, 1X formaldehyde solution was added for  
442 DNA-protein crosslinking. Cells were lysed in SDS lysis buffer followed by sonication in Bioruptor  
443 (Diagenode) to obtain 200-1000 bp chromatin fragments. ChIP dilution buffer was used to dilute the  
444 sheared chromatin followed by preclearing with Protein G Agarose beads (Sigma) for 30min. After  
445 preclearing, 20% of the lysate was kept aside as the input and the remaining was divided equally for IP  
446 and IgG. Immunoprecipitation was carried out using 5 $\mu$ g of  $\beta$ -catenin (Santa Cruz) and normal IgG  
447 control (Sigma) and incubated overnight. The following day, Protein G Agarose beads were added to  
448 collect the Antibody/Antigen/Chromatin complex. The complex was washed briefly with cold low salt  
449 immune complex wash followed by high salt immune complex buffer, lithium chloride immune  
450 complex buffer and Tris-EDTA buffer. It was then reverse-crosslinked and the DNA purified using  
451 Phenol/Chloroform extraction method. PCR amplification of the immunoprecipitated DNA was carried  
452 out using primers listed in Supplementary File 1. Composition of the ChIP buffers are provided in  
453 Supplementary Information.

#### 454 **Statistical analyses**

455 Three different experiments were subjected to an independent two-tailed Student's *t* test to measure the  
456 significance value of results under varying biological parameters. R package was used to generate the  
457 correlation graphs and calculate p values. \* indicates  $P \leq 0.05$  and \*\* indicates  $P \leq 0.01$ .

458

#### 459 **Supplementary information**

460 Supplementary Figure and Figure Legends (S1, S2, S3, S4, S5, S6, S7, S8, S9)

461 Supplementary methods

462 **Supplementary File 1:** Analysis of TCGA data for Head and Neck Squamous Cell Carcinoma  
463 patients (Excel File)

464 **Supplementary File 2:** Snapshots of miRANDA analysis for miR-146a-5p seed sequence and CD24  
465 3'UTR matching showing their free energy of binding (pdf)

466 **Supplementary File 3:** List of Primers for the qRT-PCR (Excel File)

## 467 **Acknowledgements**

468 We thank Prof. Nitai. P. Bhattacharjee (SINP), Dr. Muh-Hwa Yang (National Yang-Ming University,  
469 Taiwan) and Dr. Heike Allgayer (University of Heidelberg, Germany) for providing us the necessary  
470 plasmids. We thank Dr. Raghunath Chatterjee (Indian Statistical Institute, Kolkata, India) for  
471 performing the RNA-hybrid analysis in miRANDA software. We thank Tanmoy Dalui and Diptadeep  
472 Sarkar (CSIR-Indian Institute of Chemical Biology, Kolkata, India) for helping us with FlowCytometry  
473 and Confocal Microscopy respectively. We thank Dr. Arindam Datta (CSIR-Indian Institute of  
474 Chemical Biology, Kolkata, India) for assisting TCGA and NCI-60 dataset analysis. The work was  
475 supported by CSIR—Mayo Clinic Collaboration for Innovation and Translational Research Grant  
476 CMPP-08 and J.C. Bose National Fellowship grant JCB/2017/000005 awarded to S. Roychoudhury.  
477 S.G, D.G and P.D. are supported by fellowship from the Council of Scientific and Industrial Research  
478 (New Delhi, India). Mouse experiments and SD, RB and MG are supported by CSIR- fellowship in  
479 NCCS, Pune.

## 480 **Author contributions**

481 SG and SR conceived and designed the study. Some experiments were designed by DG and SD.  
482 Experiments, data collection and statistical analyses were performed by SG, DG, SD and PD. Some  
483 experiments were performed by RB and MG. The manuscript was written and edited by SG, DG, SD,  
484 GC and SR. All authors read and approved the final manuscript.

## 485 **Conflict of interest**

486 The authors declare that they have no conflict of interest.

## 487 References

- 488 1 Suh, Y., Amelio, I., Guerrero Urbano, T. & Tavassoli, M. Clinical update on cancer: molecular  
489 oncology of head and neck cancer. *Cell death & disease* **5**, e1018, doi:10.1038/cddis.2013.548  
490 (2014).
- 491 2 Smith, B. A. *et al.* A basal stem cell signature identifies aggressive prostate cancer phenotypes.  
492 *Proceedings of the National Academy of Sciences of the United States of America* **112**, E6544-  
493 6552, doi:10.1073/pnas.1518007112 (2015).
- 494 3 Ghuwalewala, S. *et al.* CD44(high)CD24(low) molecular signature determines the Cancer Stem  
495 Cell and EMT phenotype in Oral Squamous Cell Carcinoma. *Stem cell research* **16**, 405-417,  
496 doi:10.1016/j.scr.2016.02.028 (2016).
- 497 4 Prince, M. E. *et al.* Identification of a subpopulation of cells with cancer stem cell properties  
498 in head and neck squamous cell carcinoma. *Proceedings of the National Academy of Sciences*  
499 *of the United States of America* **104**, 973-978, doi:10.1073/pnas.0610117104 (2007).
- 500 5 Munoz, P., Iliou, M. S. & Esteller, M. Epigenetic alterations involved in cancer stem cell  
501 reprogramming. *Molecular oncology* **6**, 620-636, doi:10.1016/j.molonc.2012.10.006 (2012).
- 502 6 Lund, A. H. & van Lohuizen, M. Epigenetics and cancer. *Genes & development* **18**, 2315-2335,  
503 doi:10.1101/gad.1232504 (2004).
- 504 7 Sharma, S., Kelly, T. K. & Jones, P. A. Epigenetics in cancer. *Carcinogenesis* **31**, 27-36 (2010).
- 505 8 Calin, G. A. & Croce, C. M. MicroRNA signatures in human cancers. *Nature reviews. Cancer* **6**,  
506 857-866, doi:10.1038/nrc1997 (2006).
- 507 9 Courthod, G., Franco, P., Palermo, L., Piscanti, S. & Numico, G. The role of microRNA in head  
508 and neck cancer: current knowledge and perspectives. *Molecules (Basel, Switzerland)* **19**,  
509 5704-5716, doi:10.3390/molecules19055704 (2014).
- 510 10 Min, A. *et al.* MicroRNAs as Important Players and Biomarkers in Oral Carcinogenesis. *BioMed*  
511 *research international* **2015**, 186904, doi:10.1155/2015/186904 (2015).
- 512 11 Liu, C. & Tang, D. G. MicroRNA regulation of cancer stem cells. *Cancer research* **71**, 5950-5954,  
513 doi:10.1158/0008-5472.can-11-1035 (2011).
- 514 12 Tiwari, A., Shivananda, S., Gopinath, K. S. & Kumar, A. MicroRNA-125a reduces proliferation  
515 and invasion of oral squamous cell carcinoma cells by targeting estrogen-related receptor  
516 alpha: implications for cancer therapeutics. *The Journal of biological chemistry* **289**, 32276-  
517 32290, doi:10.1074/jbc.M114.584136 (2014).
- 518 13 Chen, D. *et al.* miR-100 induces epithelial-mesenchymal transition but suppresses  
519 tumorigenesis, migration and invasion. *PLoS genetics* **10**, e1004177,  
520 doi:10.1371/journal.pgen.1004177 (2014).
- 521 14 Yu, Z., Li, Y., Fan, H., Liu, Z. & Pestell, R. G. miRNAs regulate stem cell self-renewal and  
522 differentiation. *Frontiers in genetics* **3**, 191, doi:10.3389/fgene.2012.00191 (2012).
- 523 15 Sun, X. *et al.* MicroRNAs and cancer stem cells: the sword and the shield. *Oncogene* **33**, 4967-  
524 4977, doi:10.1038/onc.2013.492 (2014).
- 525 16 Chaffer, C. L. *et al.* Poised chromatin at the ZEB1 promoter enables breast cancer cell plasticity  
526 and enhances tumorigenicity. *Cell* **154**, 61-74, doi:10.1016/j.cell.2013.06.005 (2013).
- 527 17 Shi, Y., Liu, C., Liu, X., Tang, D. G. & Wang, J. The microRNA miR-34a inhibits non-small cell lung  
528 cancer (NSCLC) growth and the CD44hi stem-like NSCLC cells. *PloS one* **9**, e90022,  
529 doi:10.1371/journal.pone.0090022 (2014).
- 530 18 Xu, N., Papagiannakopoulos, T., Pan, G., Thomson, J. A. & Kosik, K. S. MicroRNA-145 regulates  
531 OCT4, SOX2, and KLF4 and represses pluripotency in human embryonic stem cells. *Cell* **137**,  
532 647-658, doi:10.1016/j.cell.2009.02.038 (2009).
- 533 19 Yang, X., Ni, W. & Lei, K. miR-200b suppresses cell growth, migration and invasion by targeting  
534 Notch1 in nasopharyngeal carcinoma. *Cellular physiology and biochemistry : international*

- 535 *journal of experimental cellular physiology, biochemistry, and pharmacology* **32**, 1288-1298,  
536 doi:10.1159/000354527 (2013).
- 537 20 Hung, P. S. *et al.* miR-146a enhances the oncogenicity of oral carcinoma by concomitant  
538 targeting of the IRAK1, TRAF6 and NUMB genes. *PLoS one* **8**, e79926,  
539 doi:10.1371/journal.pone.0079926 (2013).
- 540 21 Hwang, W. L. *et al.* MicroRNA-146a directs the symmetric division of Snail-dominant colorectal  
541 cancer stem cells. *Nature cell biology* **16**, 268-280, doi:10.1038/ncb2910 (2014).
- 542 22 Gottardi, C. J., Wong, E. & Gumbiner, B. M. E-cadherin suppresses cellular transformation by  
543 inhibiting beta-catenin signaling in an adhesion-independent manner. *The Journal of cell*  
544 *biology* **153**, 1049-1060 (2001).
- 545 23 Liu, Y., Huang, T., Zhao, X. & Cheng, L. MicroRNAs modulate the Wnt signaling pathway  
546 through targeting its inhibitors. *Biochemical and biophysical research communications* **408**,  
547 259-264, doi:10.1016/j.bbrc.2011.04.009 (2011).
- 548 24 Perry, J. M. *et al.* Cooperation between both Wnt/{beta}-catenin and PTEN/PI3K/Akt signaling  
549 promotes primitive hematopoietic stem cell self-renewal and expansion. *Genes &*  
550 *development* **25**, 1928-1942, doi:10.1101/gad.17421911 (2011).
- 551 25 Zeng, X. C. *et al.* Downregulation of miR-610 promotes proliferation and tumorigenicity and  
552 activates Wnt/beta-catenin signaling in human hepatocellular carcinoma. *Molecular cancer*  
553 **13**, 261, doi:10.1186/1476-4598-13-261 (2014).
- 554 26 Vegfors, J., Petersson, S., Kovacs, A., Polyak, K. & Enerback, C. The expression of Psoriasin  
555 (S100A7) and CD24 is linked and related to the differentiation of mammary epithelial cells.  
556 *PLoS one* **7**, e53119, doi:10.1371/journal.pone.0053119 (2012).
- 557 27 Muppala, S. *et al.* CD24 induces expression of the oncomir miR-21 via Src, and CD24 and Src  
558 are both post-transcriptionally downregulated by the tumor suppressor miR-34a. *PLoS one* **8**,  
559 e59563, doi:10.1371/journal.pone.0059563 (2013).
- 560 28 Chen, C. *et al.* Real-time quantification of microRNAs by stem-loop RT-PCR. *Nucleic acids*  
561 *research* **33**, e179, doi:10.1093/nar/gni178 (2005).
- 562 29 Park, S. M., Gaur, A. B., Lengyel, E. & Peter, M. E. The miR-200 family determines the epithelial  
563 phenotype of cancer cells by targeting the E-cadherin repressors ZEB1 and ZEB2. *Genes &*  
564 *development* **22**, 894-907, doi:10.1101/gad.1640608 (2008).
- 565 30 Henson, B. J., Bhattacharjee, S., O'Dee, D. M., Feingold, E. & Gollin, S. M. Decreased expression  
566 of miR-125b and miR-100 in oral cancer cells contributes to malignancy. *Genes, chromosomes*  
567 *& cancer* **48**, 569-582, doi:10.1002/gcc.20666 (2009).
- 568 31 Li, J. *et al.* MiR-21 indicates poor prognosis in tongue squamous cell carcinomas as an  
569 apoptosis inhibitor. *Clinical cancer research : an official journal of the American Association*  
570 *for Cancer Research* **15**, 3998-4008, doi:10.1158/1078-0432.ccr-08-3053 (2009).
- 571 32 Sethi, N., Wright, A., Wood, H. & Rabbitts, P. MicroRNAs and head and neck cancer: reviewing  
572 the first decade of research. *European journal of cancer (Oxford, England : 1990)* **50**, 2619-  
573 2635, doi:10.1016/j.ejca.2014.07.012 (2014).
- 574 33 Paik, J. H. *et al.* MicroRNA-146a downregulates NFkappaB activity via targeting TRAF6 and  
575 functions as a tumor suppressor having strong prognostic implications in NK/T cell lymphoma.  
576 *Clinical cancer research : an official journal of the American Association for Cancer Research*  
577 **17**, 4761-4771, doi:10.1158/1078-0432.ccr-11-0494 (2011).
- 578 34 Shi, Z., Johnson, J. J., Jiang, R., Liu, Y. & Stack, M. S. Decrease of miR-146a is associated with  
579 the aggressiveness of human oral squamous cell carcinoma. *Archives of oral biology* **60**, 1416-  
580 1427, doi:10.1016/j.archoralbio.2015.06.007 (2015).
- 581 35 Zhang, Z., Zhang, Y., Sun, X. X., Ma, X. & Chen, Z. N. microRNA-146a inhibits cancer metastasis  
582 by downregulating VEGF through dual pathways in hepatocellular carcinoma. *Molecular*  
583 *cancer* **14**, 5, doi:10.1186/1476-4598-14-5 (2015).
- 584 36 Comprehensive genomic characterization of head and neck squamous cell carcinomas. *Nature*  
585 **517**, 576-582, doi:10.1038/nature14129 (2015).

- 586 37 Takebe, N. *et al.* Targeting Notch, Hedgehog, and Wnt pathways in cancer stem cells: clinical  
587 update. *Nature reviews. Clinical oncology* **12**, 445-464, doi:10.1038/nrclinonc.2015.61 (2015).
- 588 38 McGill, M. A. & McGlade, C. J. Mammalian numb proteins promote Notch1 receptor  
589 ubiquitination and degradation of the Notch1 intracellular domain. *The Journal of biological*  
590 *chemistry* **278**, 23196-23203, doi:10.1074/jbc.M302827200 (2003).
- 591 39 Orsulic, S., Huber, O., Aberle, H., Arnold, S. & Kemler, R. E-cadherin binding prevents beta-  
592 catenin nuclear localization and beta-catenin/LEF-1-mediated transactivation. *Journal of cell*  
593 *science* **112 ( Pt 8)**, 1237-1245 (1999).
- 594 40 Li, J. & Zhou, B. P. Activation of beta-catenin and Akt pathways by Twist are critical for the  
595 maintenance of EMT associated cancer stem cell-like characters. *BMC Cancer* **11**, 49,  
596 doi:10.1186/1471-2407-11-49 (2011).
- 597 41 Zhao, S. *et al.* Activation of Akt/GSK-3beta/beta-catenin signaling pathway is involved in  
598 survival of neurons after traumatic brain injury in rats. *Neurological research* **34**, 400-407,  
599 doi:10.1179/1743132812y.0000000025 (2012).
- 600 42 Lim W, Y. C., Park S, Bazer FW, Song G. Inhibitory Effects of Quercetin on Progression of Human  
601 Choriocarcinoma Cells Are Mediated Through PI3K/AKT and MAPK Signal Transduction  
602 Cascades. *J Cell Physiol* **Jun;232(6)**, 1428-1440. , doi:doi: 10.1002/jcp.25637. (2017 ).
- 603 43 Sun, X. *et al.* miR-146a is directly regulated by STAT3 in human hepatocellular carcinoma cells  
604 and involved in anti-tumor immune suppression. *Cell Cycle* **14**, 243-252 (2014).
- 605 44 Taganov, K. D., Boldin, M. P., Chang, K. J. & Baltimore, D. NF-kappaB-dependent induction of  
606 microRNA miR-146, an inhibitor targeted to signaling proteins of innate immune responses.  
607 *Proceedings of the National Academy of Sciences of the United States of America* **103**, 12481-  
608 12486, doi:10.1073/pnas.0605298103 (2006).
- 609 45 Chaffer, C. L. *et al.* Normal and neoplastic nonstem cells can spontaneously convert to a stem-  
610 like state. *Proceedings of the National Academy of Sciences of the United States of America*  
611 **108**, 7950-7955, doi:10.1073/pnas.1102454108 (2011).
- 612 46 Jaggupilli, A. & Elkord, E. Significance of CD44 and CD24 as cancer stem cell markers: an  
613 enduring ambiguity. *Clinical & developmental immunology* **2012**, 708036,  
614 doi:10.1155/2012/708036 (2012).
- 615 47 Ling, H., Fabbri, M. & Calin, G. A. MicroRNAs and other non-coding RNAs as targets for  
616 anticancer drug development. *Nature reviews. Drug discovery* **12**, 847-865,  
617 doi:10.1038/nrd4140 (2013).
- 618 48 Cheng, W., Liu, T., Wan, X., Gao, Y. & Wang, H. MicroRNA-199a targets CD44 to suppress the  
619 tumorigenicity and multidrug resistance of ovarian cancer-initiating cells. *The FEBS journal*  
620 **279**, 2047-2059, doi:10.1111/j.1742-4658.2012.08589.x (2012).
- 621 49 Liu, C. *et al.* The microRNA miR-34a inhibits prostate cancer stem cells and metastasis by  
622 directly repressing CD44. *Nature medicine* **17**, 211-215, doi:10.1038/nm.2284 (2011).
- 623 50 Forloni, M. *et al.* miR-146a promotes the initiation and progression of melanoma by activating  
624 Notch signaling. *eLife* **3**, e01460, doi:10.7554/eLife.01460 (2014).
- 625 51 Wang, X. *et al.* Kruppel-like factor 8 promotes tumorigenic mammary stem cell induction by  
626 targeting miR-146a. *American journal of cancer research* **3**, 356-373 (2013).
- 627 52 Sagiv, E. *et al.* Targeting CD24 for treatment of colorectal and pancreatic cancer by monoclonal  
628 antibodies or small interfering RNA. *Cancer research* **68**, 2803-2812, doi:10.1158/0008-  
629 5472.can-07-6463 (2008).
- 630 53 Cremers, N. *et al.* CD24 Is Not Required for Tumor Initiation and Growth in Murine Breast and  
631 Prostate Cancer Models. *PLoS one* **11**, e0151468, doi:10.1371/journal.pone.0151468 (2016).
- 632 54 Zhang, H. F. *et al.* The PI3K/AKT/c-MYC axis promotes the acquisition of cancer stem-like  
633 features in esophageal squamous cell carcinoma. *Stem cells (Dayton, Ohio)*,  
634 doi:10.1002/stem.2395 (2016).
- 635 55 Xia, P. & Xu, X. Y. PI3K/Akt/mTOR signaling pathway in cancer stem cells: from basic research  
636 to clinical application. *American journal of cancer research* **5**, 1602-1609 (2015).

- 637 56 Dubrovska, A. *et al.* The role of PTEN/Akt/PI3K signaling in the maintenance and viability of  
638 prostate cancer stem-like cell populations. *Proceedings of the National Academy of Sciences*  
639 *of the United States of America* **106**, 268-273 (2009).
- 640 57 Huang, T. S. *et al.* A Regulatory Network Involving beta-Catenin, e-Cadherin, PI3k/Akt, and  
641 Slug Balances Self-Renewal and Differentiation of Human Pluripotent Stem Cells In Response  
642 to Wnt Signaling. *Stem Cells* **33**, 1419-1433 (2015).
- 643 58 Ma, Y., Wang, X., Peng, Y. & Ding, X. Forkhead box O1 promotes INS-1 cell apoptosis by  
644 reducing the expression of CD24. *Molecular Medicine Reports* **13**, 2991-2998,  
645 doi:10.3892/mmr.2016.4896 (2016).
- 646 59 Vesuna, F., Lisok, A., Kimble, B. & Raman, V. Twist modulates breast cancer stem cells by  
647 transcriptional regulation of CD24 expression. *Neoplasia (New York, N.Y.)* **11**, 1318-1328  
648 (2009).
- 649 60 Ni, Y. G. *et al.* FoxO transcription factors activate Akt and attenuate insulin signaling in heart  
650 by inhibiting protein phosphatases. *Proceedings of the National Academy of Sciences of the*  
651 *United States of America* **104**, 20517-20522, doi:10.1073/pnas.0610290104 (2007).
- 652 61 Hosonaga, M., Arima, Y., Sugihara, E., Kohno, N. & Saya, H. Expression of CD24 is associated  
653 with HER2 expression and supports HER2-Akt signaling in HER2-positive breast cancer cells.  
654 *Cancer science* **105**, 779-787, doi:10.1111/cas.12427 (2014).

655

656

## 657 **FIGURE LEGENDS**

658

659 **Fig. 1.** Over-expression of miR-146a in CD44<sup>high</sup>CD24<sup>low</sup> cells of Oral Squamous Cell Carcinoma. (a)  
660 Total RNA extracted from the stem (CD44<sup>high</sup>CD24<sup>low</sup>) and the non-stem (CD44<sup>low</sup>CD24<sup>high</sup>) sub-  
661 populations of SCC25 cells were reverse-transcribed using stem-loop primers specific for subsequent  
662 Real time PCR analysis of various miRNAs using respective forward primers and Universal reverse  
663 primer (Additional File 1). (b) Expression of miR-146a was re-analyzed in UPCI: SCC131 and UPCI:  
664 SCC084 by qRT-PCR. (c) Quantification of miR-146a transcripts in the spheres enriched from  
665 CD44<sup>high</sup>CD24<sup>low</sup> cells of SCC131 compared to that grown under differentiating adherent conditions.  
666 Data is representative of 3 independent experiments and the bar graph is shown with mean ± SD (right).  
667 U6snRNA was used to normalize relative expression values. Students t test used to calculate p-value (\*  
668 P<0.05, \*\*P<0.01, \*\*\* P<0.001). (d) Box-Scatter plot showing the differential expression of miR-146a  
669 in the CD44<sup>high</sup>CD24<sup>low</sup> and CD44<sup>low</sup>CD24<sup>high</sup> subgroup of HNSCC tumors obtained from TCGA. (p-  
670 value was calculated in R package to show statistical significance).

671

672 **Fig. 2.** Cancer stem cell characteristics induced by miR-146a in OSCC cell lines. (a) MiR-146a  
673 transfected SCC131 cells were analyzed by flow cytometry and mean fluorescence values of CD44  
674 (PE) and CD24 (FITC) are shown. (b) Equal number of vector and miR-146a transfected UPCI:  
675 SCC131 and UPCI: SCC036 cells were seeded in ultralow-attachment 6-well plate at clonal density.  
676 Sphere forming structures was captured at five random fields at 20X magnification using phase contrast  
677 microscope (Leica CTR4000) with scale bar equal to 50  $\mu$ m. (c) Representative images of western blots  
678 showing dose dependent increment of Sox2, C-myc, Oct-4, Involucrin and CD44, CD24 in the UPCI:  
679 SCC036, UPCI: SCC131 and UPCI: SCC084 upon ectopic expression of miR-146a.  $\beta$ -actin bands was  
680 used to normalize the data. Band intensities of each protein has been quantified from three biological  
681 replicates and the average  $\pm$  sd is plotted in GraphPad prism 5 showing statistical significance in the  
682 respective graphs (below)(\*  $P < 0.05$ , \*\* $P < 0.01$ , \*\*\*  $P < 0.001$ )(d) Similar western blots upon  
683 transfection of miR-146a with mutated seed sequences in UPCI:SCC131 and its graphical  
684 representation (below).

685

686 **Fig. 3.** MiR-146a induced  $\beta$ -catenin/Wnt Signaling in  $CD44^{high}CD24^{low}$  population. (a) Isolation of  
687  $CD24^{low}$  and  $CD24^{high}$  cells from SCC084, as shown by qRT-PCR of CD24. Western blot images of  $\beta$ -  
688 catenin, Oct-4, E-cadherin and Involucrin in the respective populations along with its quantitative plot  
689 indicating the statistical data. (b) Representative confocal immunofluorescence images (60X  
690 magnification) of  $CD44^{high}CD24^{high}$  and  $CD44^{high}CD24^{low}$  subpopulation of SCC131 showing  $\beta$ -catenin  
691 (green) and CD44 (red) counterstained with DAPI (blue) (scale bar equal to 10  $\mu$ m) (c) Each of the  
692 SCC cell lines were subjected to western blot analysis of  $\beta$ -catenin and E-cadherin upon increasing  
693 doses of miR-146a. (d)  $\beta$ -catenin and Oct-4 immunoblotting upon increasing doses of anti-miR-146a.  
694 Data normalized with  $\beta$ -actin. All the data has been graphically represented beneath the respective  
695 figures (\*  $P < 0.05$ , \*\* $P < 0.01$ , \*\*\*  $P < 0.001$ ) (e) Association of miR-146a expression with CD24 in the  
696 NCI-60 cell lines (n=59) and (f) with  $\beta$ -catenin/CD24 ratio in the  $CD44^{high}$  tumors of the TCGA HNSCC  
697 patients (n=146). Statistical significance was determined by Pearson correlation test. Pearson  
698 correlation coefficient is shown in each plot. (g) Box plots showing miR-146a expression in NCI-60



699 cell lines classified as epithelial (EP) and mesenchymal (MS) subgroups. p value has been calculated  
700 using mann-whitney's u-test. (h) Correlation (Pearson) of miR-146a with CDH1/VIM expression ratio  
701 based on the RNA-Seq data from 292 TCGA HNSCC specimens

702

703 **Fig. 4.** MiR-146a targets CD24 post-transcriptionally. (a) Immunoblotting of CD24 in SCC131 cells  
704 subjected to miR-146a knockdown showing significant up-regulation upon normalization with  $\beta$ -actin.  
705 (b) qRT-PCR to detect CD24 transcripts in the anti-miR-146a treated or (c) miR-146a over-expressed  
706 SCC131 and SCC084 cells. 18srRNA served as an endogenous control and p-values calculated by  
707 Student's t-test. Schematic representation of the CD24 3'UTR luciferase constructs. (d) Luciferase  
708 activity of the CD24 3'UTR reporter gene in SCC084 cells with increasing expression of miR-146a or  
709 miR-SDM (mutant miR-146a). (e) CD24 3'UTR reporter activity upon miR-146a over-expression and  
710 (f) miR-146a knockdown in SCC131 cells. Data in (d)-(f) are mean  $\pm$ SD, normalized with pRL-TK  
711 vector and statistical significance was measured by paired Student's t test (two-tailed).

712

713 **Fig. 5.** MiR-146a promotes stemness by down-regulating CD24 and leads to AKT mediated  
714 stabilization of  $\beta$ -catenin. (a) Immunoblot analysis of SCC131 transfected with either a vector control,  
715 miR-146a with or without CD24 showing rescued expression of  $\beta$ -catenin and E-cadherin as well as  
716 Involucrin Oct-4, Sox2, C-myc. (b) Immunoblotting of the same proteins with increasing dose of CD24  
717 expression and (c) upon knockdown of CD24 in SCC131 cells.  $\beta$ -actin is loaded as an endogenous  
718 control. Histograms show fold changes in the densitometric values of band intensity and shown as  
719 means  $\pm$  S.D. of 3 individual experiments. (d) Western blot analysis revealed degradation of  $\beta$ -catenin  
720 upon CD24 over-expression revived with MG132 treatment in SCC084, SCC036. (e) Phospho-AKT  
721 levels upon miR-146a alone or in combination with CD24. Total AKT is also shown. (f) Phospho-AKT  
722 and Total AKT levels upon siRNA mediated down-regulation of CD24 in SCC036 cells. (g) Effect of  
723 pAKT inhibitor upon  $\beta$ -catenin levels in SCC084 cells. Histograms showing fold change in the

724 densitometric values of band intensity is represented as avg  $\pm$  S.D. of n different experiments (n=3) (\*  
725 P<0.05, \*\*P<0.01).

726

727 **Fig. 6.** MiR-146a promotes *in vivo* tumor growth which is rescued upon CD24/AKT modulation (a)  
728 Bar graphs showing relative weight (mg) of the tumors xenograft tumors generated from control or  
729 miR-146a expressing SCC084 treated without or with Quercetin. Data represent mean  $\pm$  SEM (n=4).  
730 P-values were computed using two-tailed Student's t-test. (b) Line graph showing relative growth rate  
731 of tumors in response to Quercetin in SCC084 cells harboring either control vector or stably expressing  
732 miR-146a. Once tumors reached a palpable size, one set of mice were injected with Quercetin (10  
733 mg/kg) intraperitoneally and after 10 successive treatment, change in tumor volume was measured at  
734 regular interval up to 20 days. Data represent mean  $\pm$ SEM (n = 4) and p-values shown using Student's  
735 t test. (c) Bar graphs showing relative weight (mg) of the tumors described in xenograft tumors  
736 generated from SCC084 harboring either control vector or stably expressing miR146a and CD24. Data  
737 represent mean  $\pm$ SEM (n=4). P-values were assessed using 2-tailed Student's t-test (d) Line graph  
738 showing relative growth rate of tumors described in (d). Data represent mean  $\pm$ SEM (n = 4). For all the  
739 experiments, p-values were calculated in graph-pad prism5 using two-tailed Student's t-test algorithm.  
740

741 **Fig.7.**  $\beta$ -catenin transactivates miR-146a mediating a positive feedback loop. (a) Increase in stemness  
742 markers upon  $\beta$ -catenin over-expression as revealed by western blot and the densitometric analysis of  
743 its band intensities (right below). Data was normalized with corresponding  $\beta$ -actin. Concomitant miR-  
744 146a expression in  $\beta$ -catenin transfected SCC131 as quantified by qPCR. (b) Increase in miR-146a  
745 transcripts upon  $\beta$ -catenin over-expression is dose dependently inhibited in the presence of either  
746 dnTCF4 or Numb. (c) Chromatin Immunoprecipitation assays in SCC084 cells transfected with either  
747 scramble siRNA or CD24 siRNA showing recruitment of  $\beta$ -catenin upon endogenous miR-146a  
748 promoter. Schematic of miR-146a promoter locus and reporter constructs namely LucA: wild-type;  
749 mLucA: TCF-4 binding site (TBS) mutation; LucB: TBS deletion[21]. (d) Relative luciferase activity

750 of LucA in SCC084 cells under various transfections as indicated. Data represent average of n=3  
751 individual experiments (along with technical replicates). (e) Transient ChIP assay with same constructs  
752 as shown. The percentage enrichment of amplified product was normalized to input and graphically  
753 presented. Data represent mean  $\pm$  sd and n=3 different experiments (along with technical replicates\* $P$ <  
754 0.05, \*\* $P$ < 0.01). We used Student's  $t$ -test calculate  $p$ -value.

755

756 **Fig.8.** Model –schematic representation of transient inter-conversions between stem and non-stem oral  
757 cancer cells. Cancer stem cell induction may be triggered with over-expression of miR-146a that targets  
758 CD24 and leads to  $\beta$ -catenin protein stabilization via AKT activation. Wnt signalling intermediates  
759 promote stem-like de-differentiated state in the tumor cells. Accumulation of  $\beta$ -catenin might further  
760 drive miR-146a expression and amplify the stemness characteristics. Stochastic intra-cellular signals  
761 may induce differentiation, probably by aberrant activation of CD24. This leads to decline in pAKT  
762 levels and hence proteasomal degradation of  $\beta$ -catenin with subsequent loss of miR-146a.

763

764

765

766

767

768 **Figure 1**

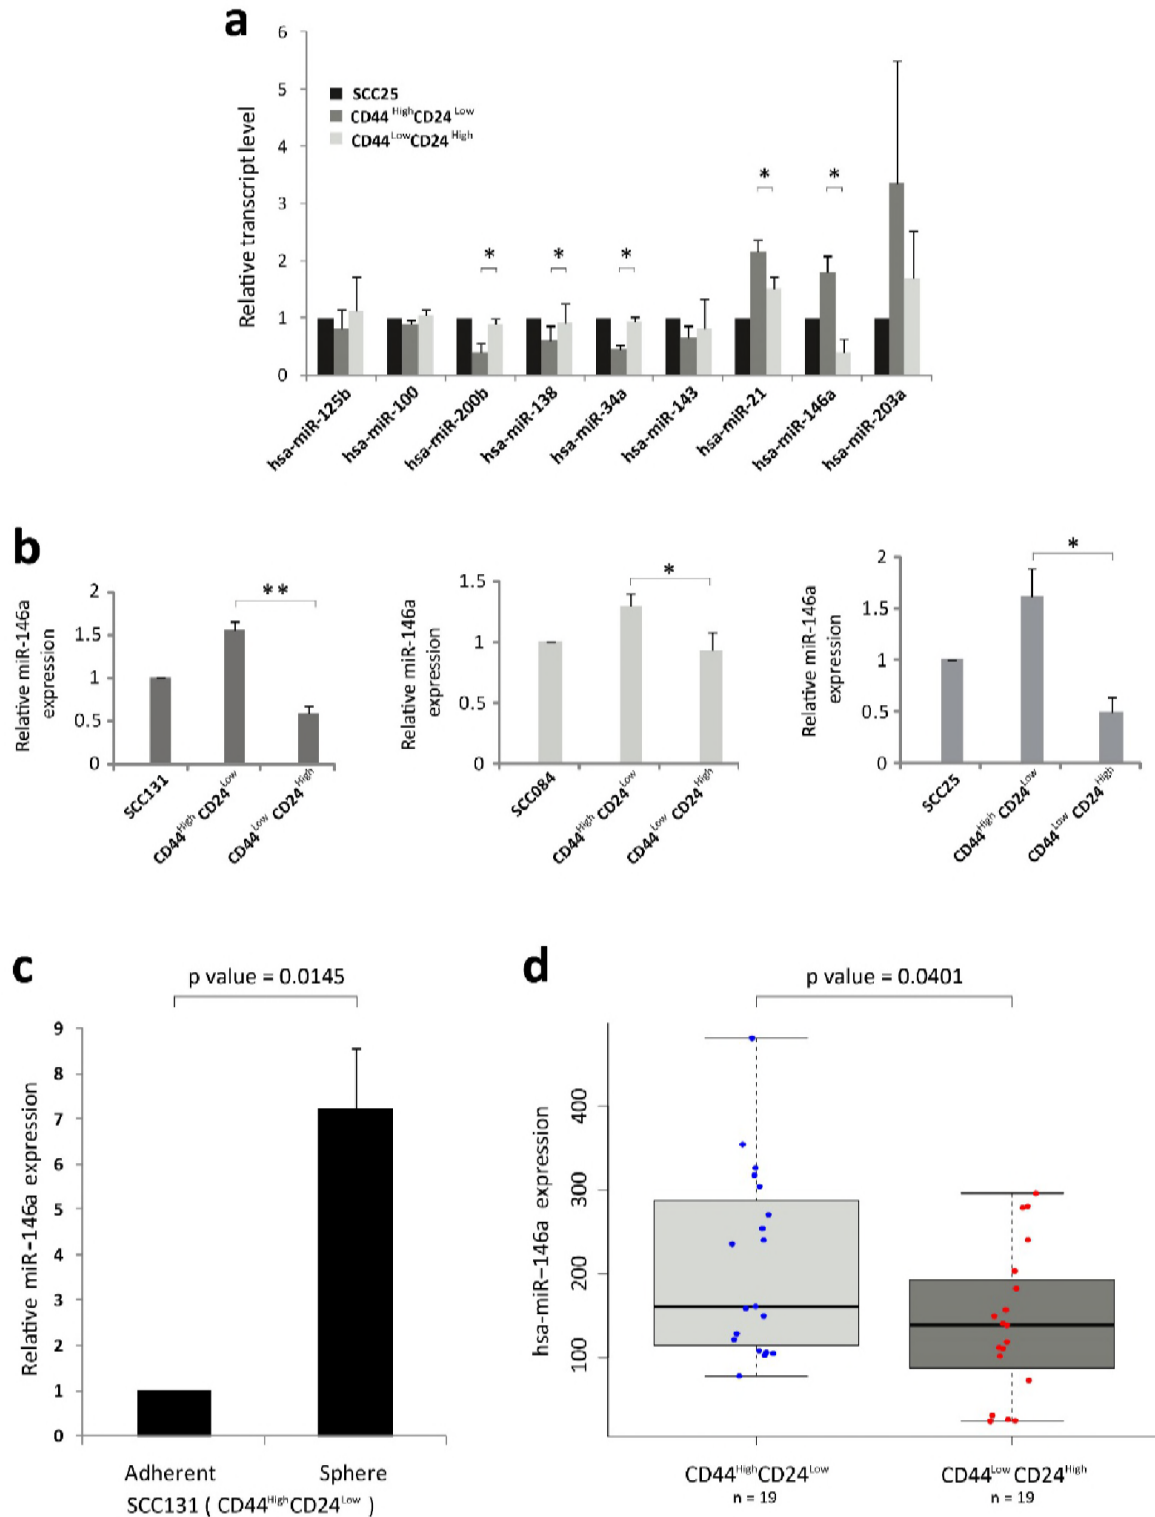

769

770

771 **Figure 2**

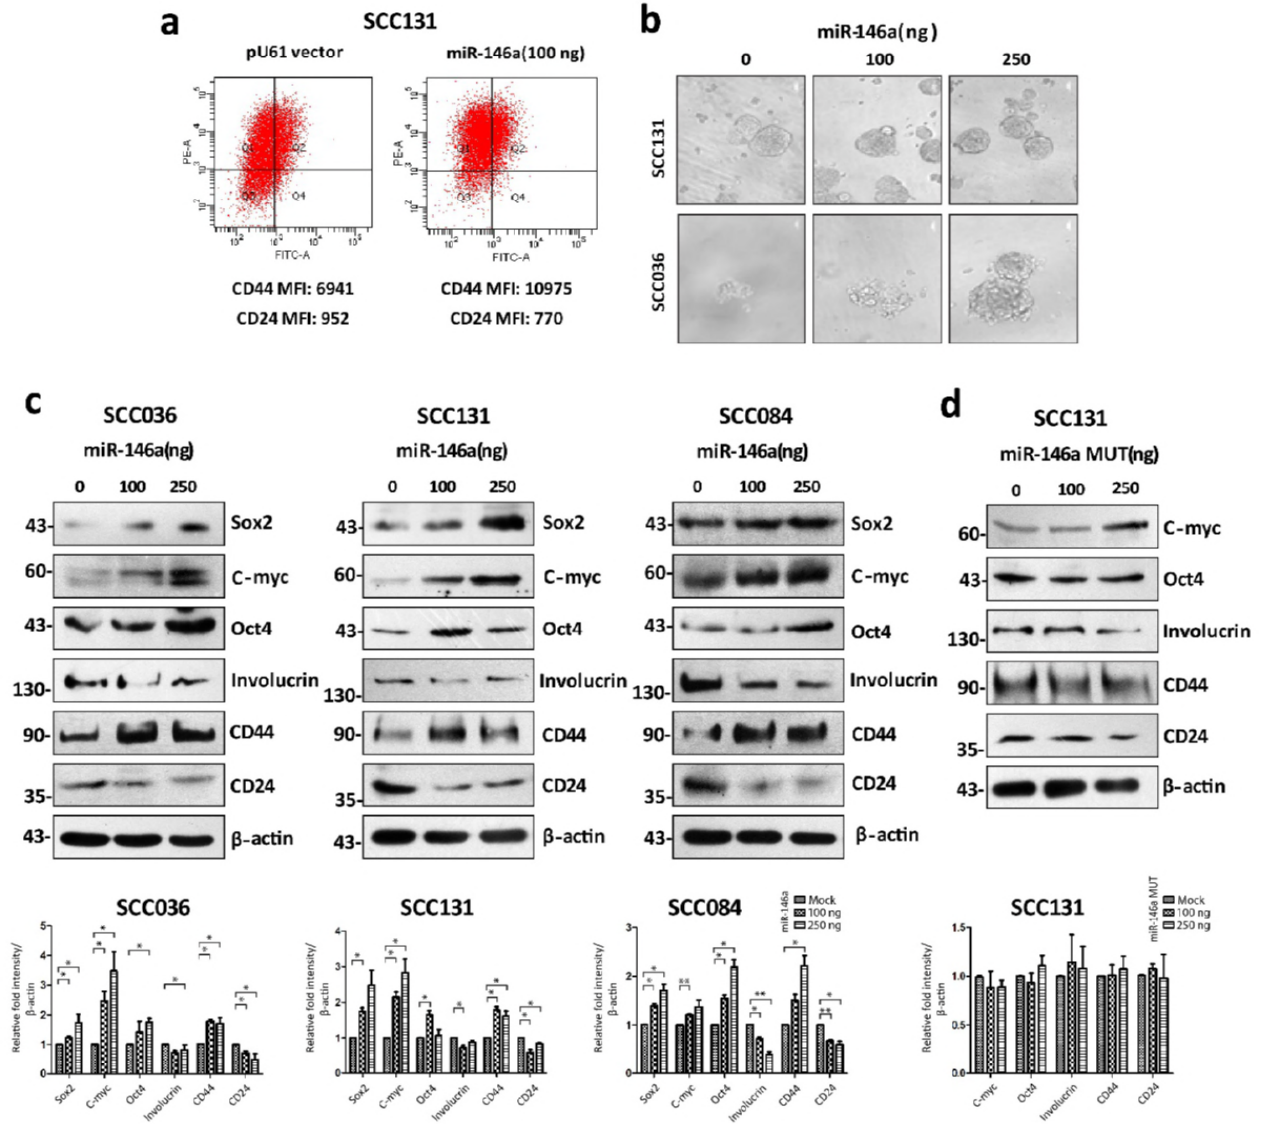

772

773

774

775

776

777

778 **Figure 3**

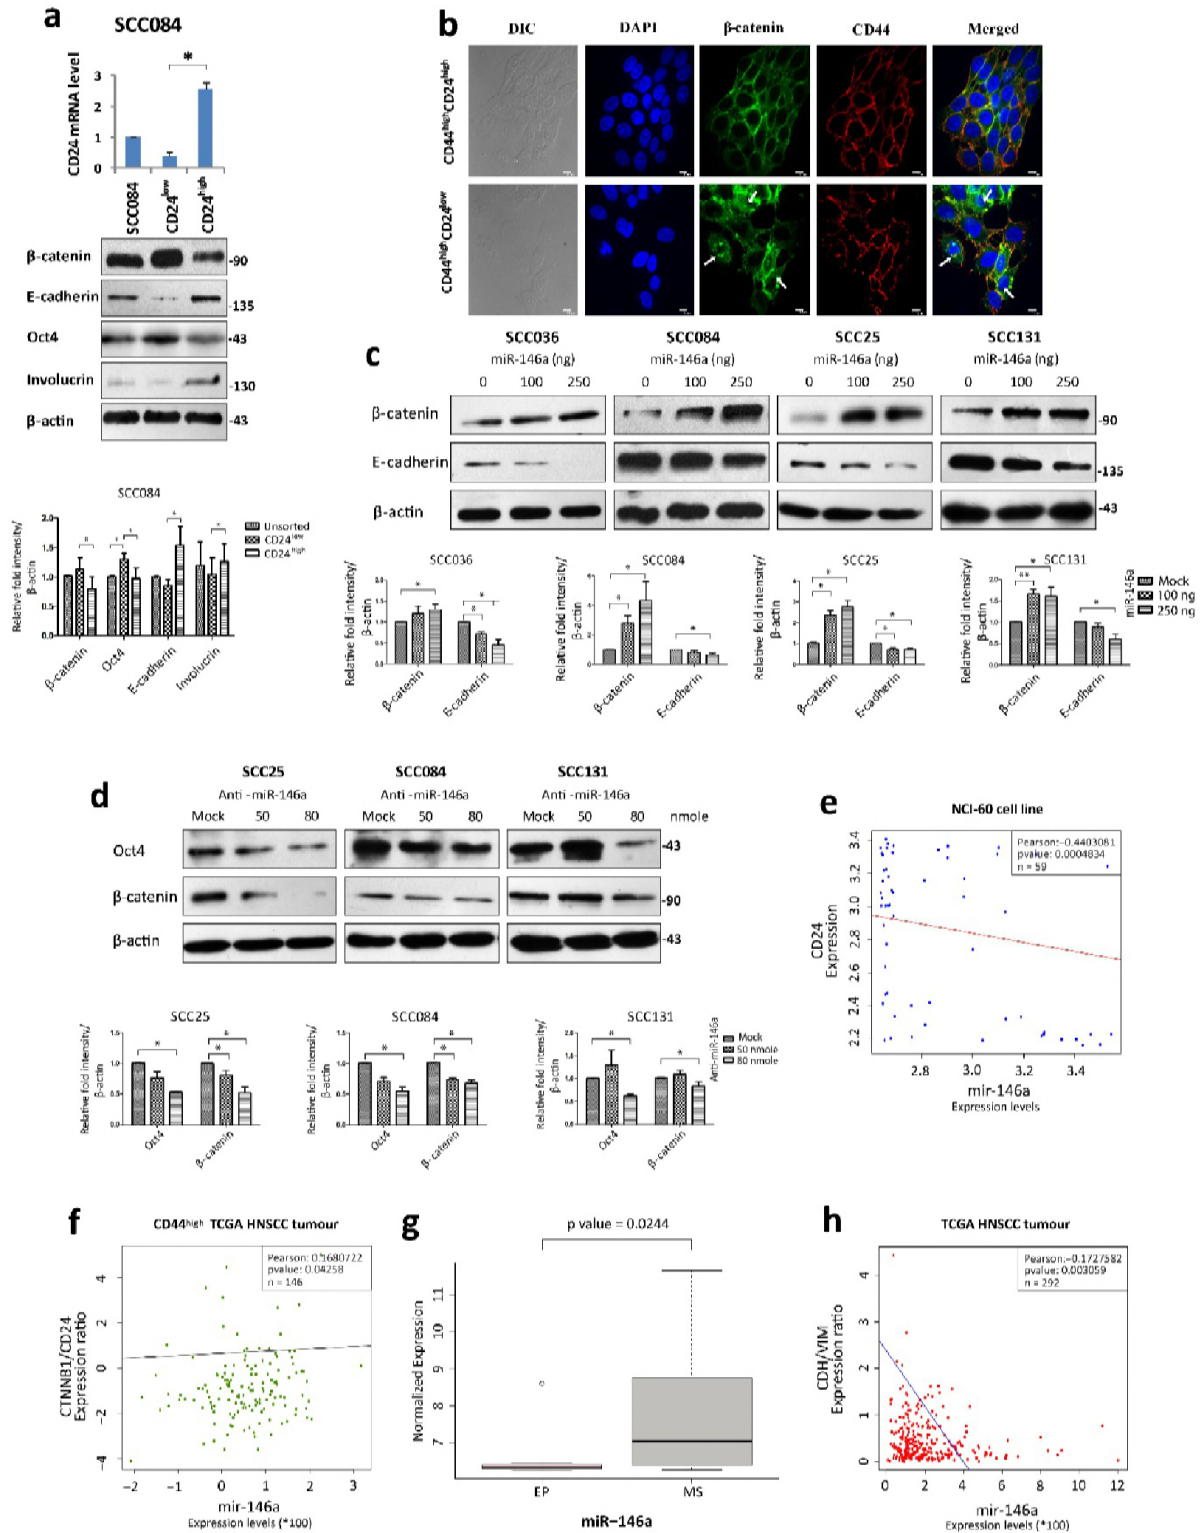

779

780

781 **Figure 4**

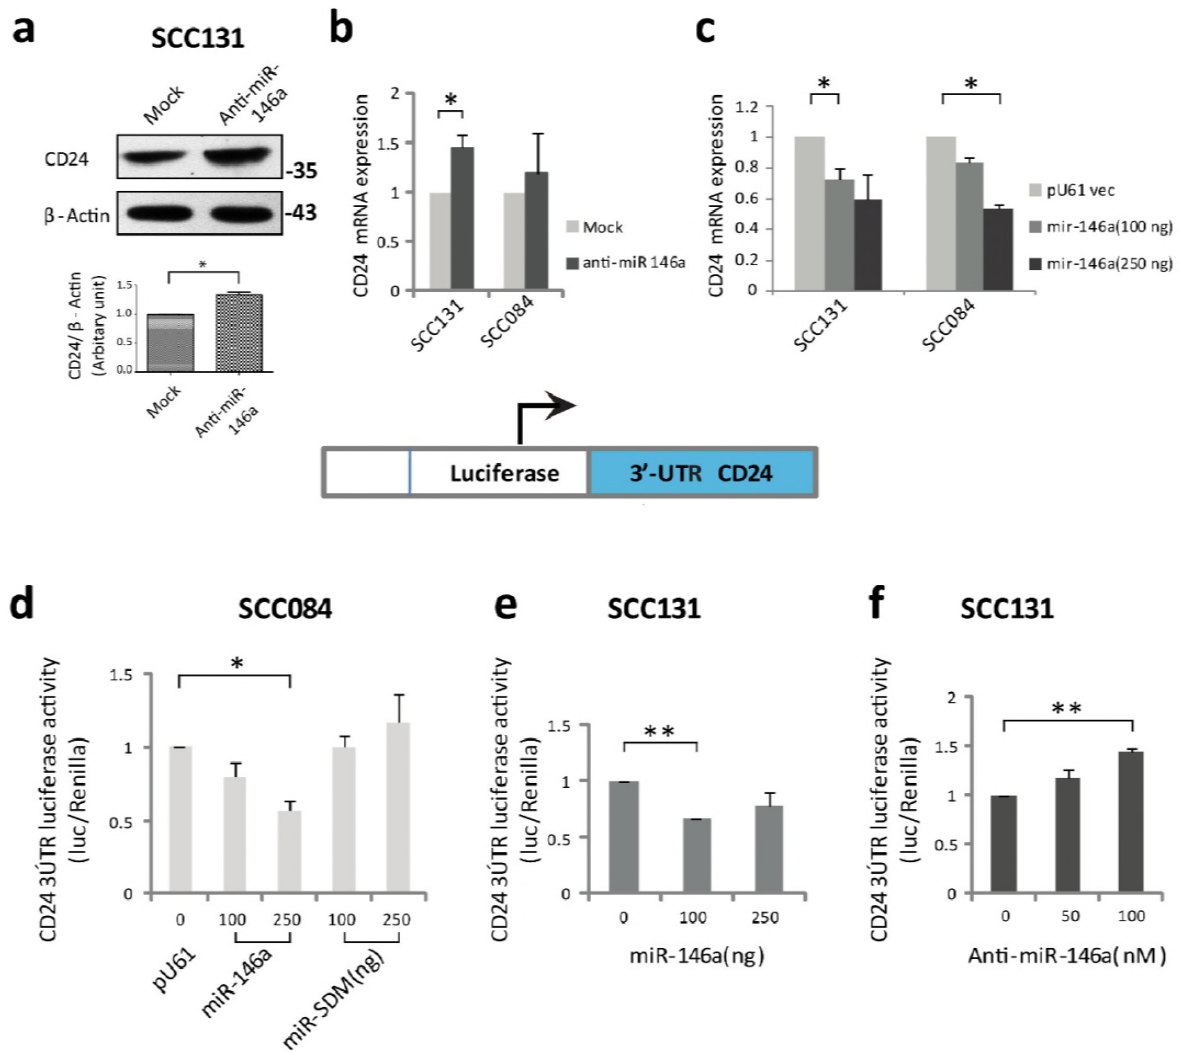

782

783

784

785

786

787

788

789 **Figure 5**

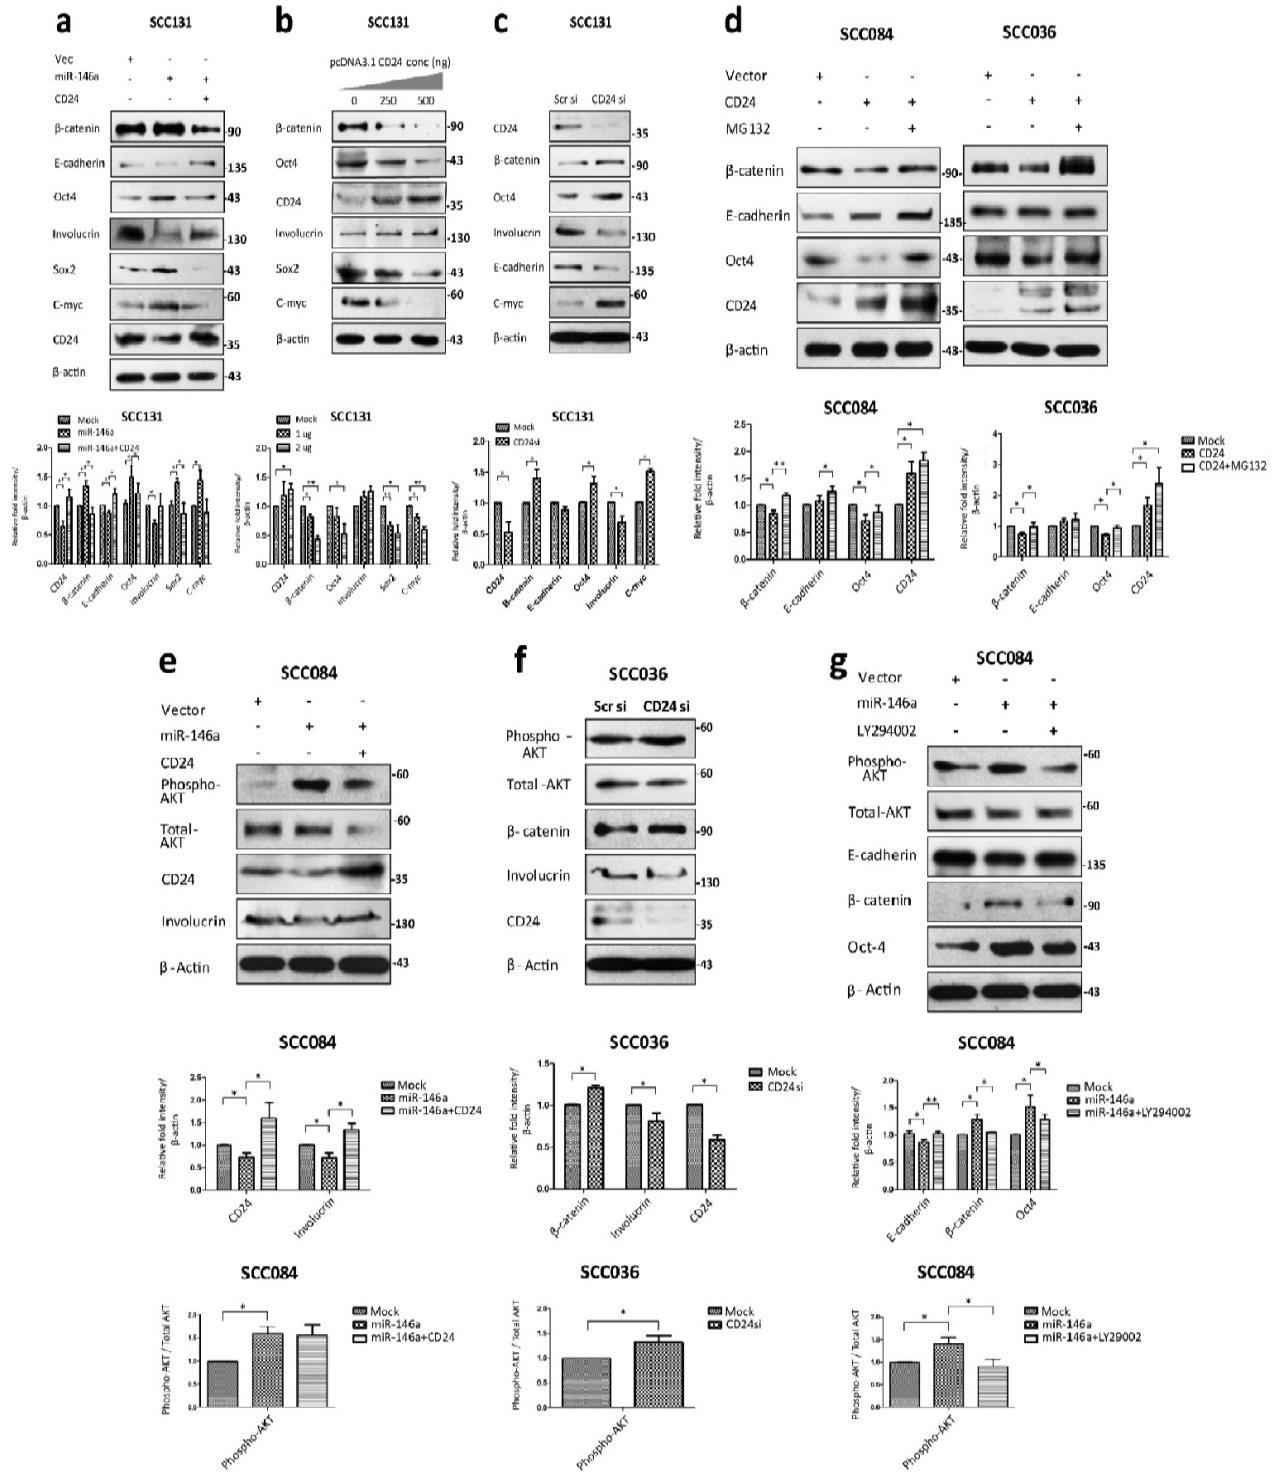

790

791

792

793 **Figure 6**



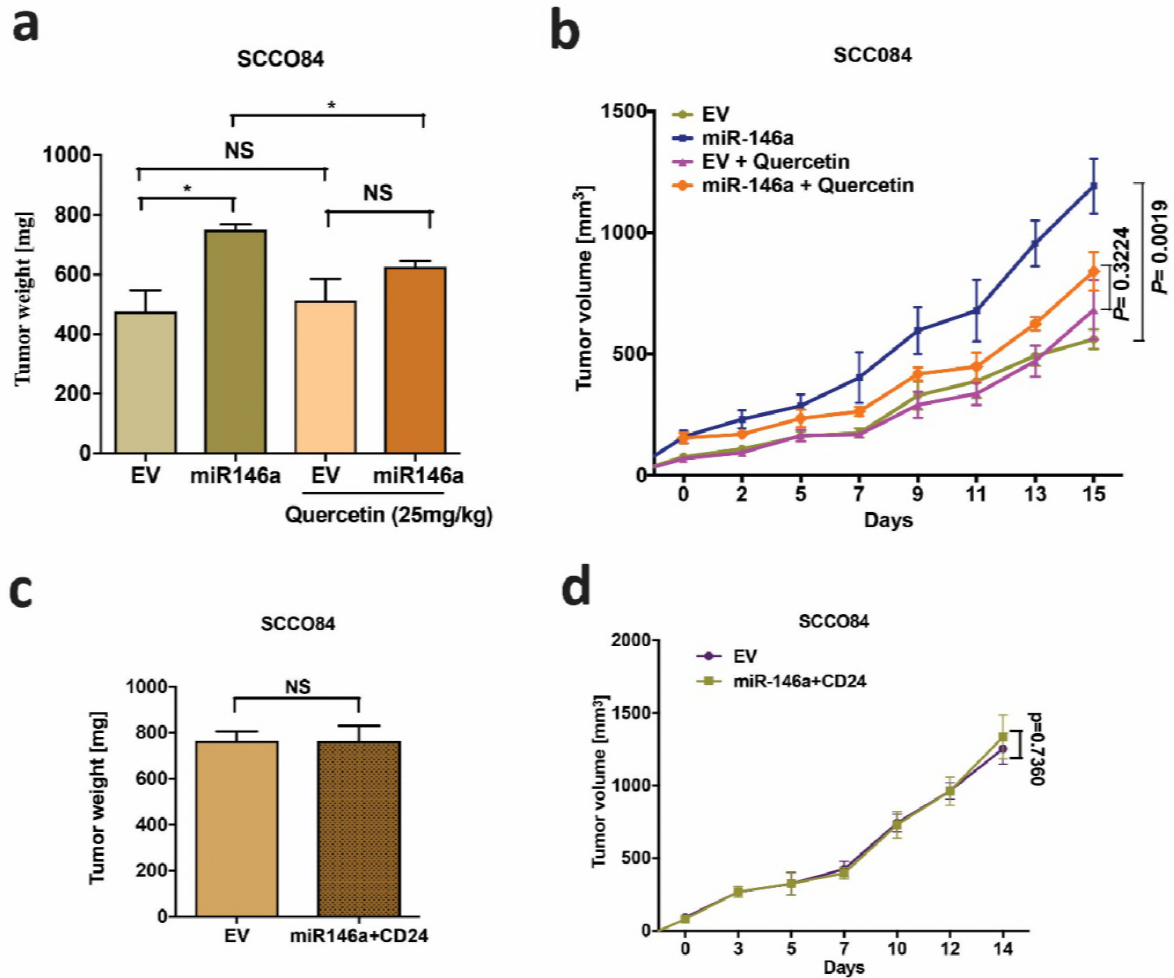

794

795

796

797

798

799

800

801 **Figure 7**

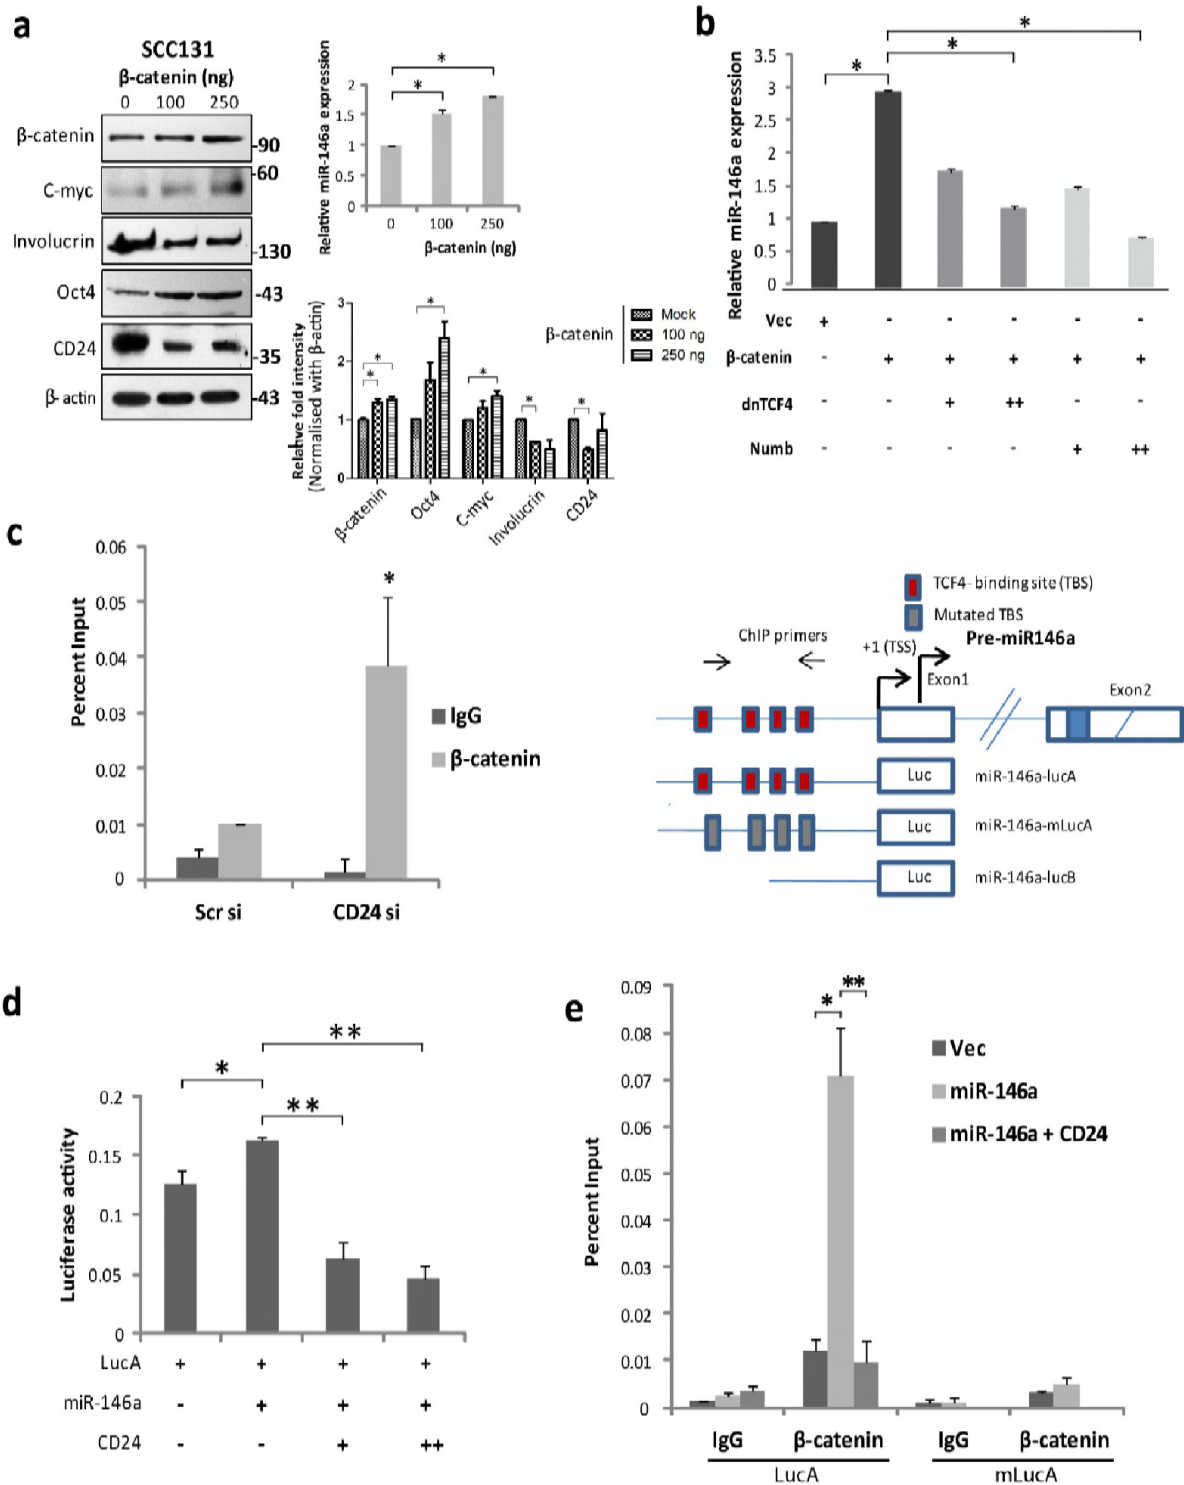

802

803

804 **Figure 8**

## Proposed Model

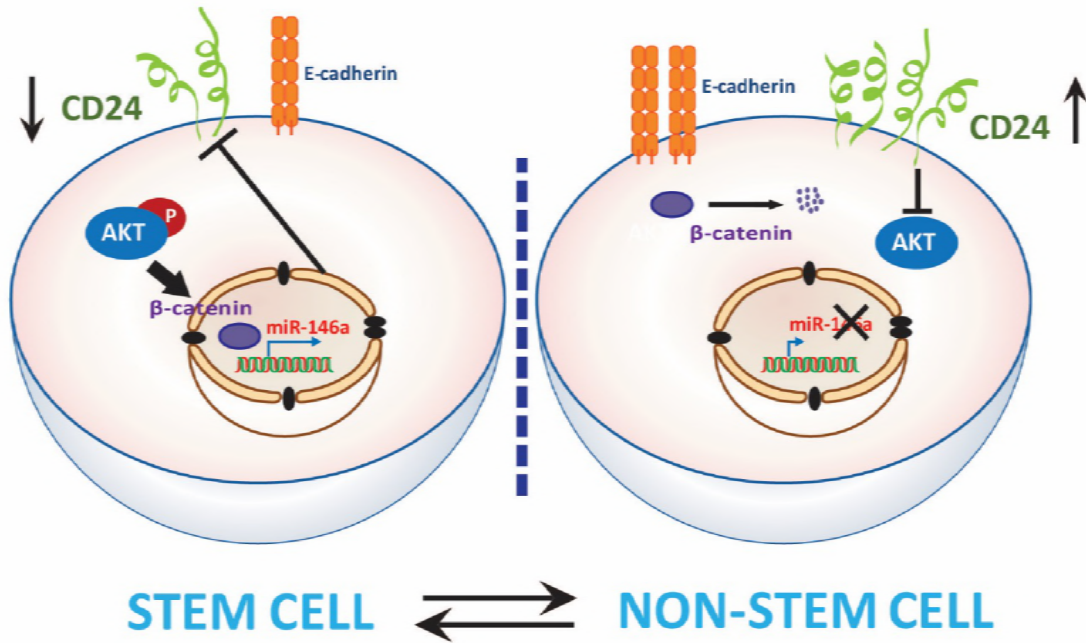

805

806

807

### Node Postive group

| bcr_patient_barcode | hsa-miR-146a |
|---------------------|--------------|
| TCGA-BA-4077        | 203.493174   |
| TCGA-F7-A61V        | #N/A         |
| TCGA-C9-A47Z        | 39.004298    |
| TCGA-F7-A624        | #N/A         |
| TCGA-IQ-A61K        | #N/A         |
| TCGA-BA-A6DF        | #N/A         |
| TCGA-IQ-A61G        | #N/A         |
| TCGA-IQ-A61J        | #N/A         |
| TCGA-KU-A66S        | #N/A         |
| TCGA-BA-A6DA        | #N/A         |
| TCGA-BA-6870        | 536.192164   |
| TCGA-CV-6951        | 77.749028    |
| TCGA-CR-6481        | 540.841402   |
| TCGA-BA-6871        | 93.860077    |
| TCGA-CR-6473        | 909.354573   |
| TCGA-BA-6873        | 101.434427   |
| TCGA-CR-6474        | 129.58015    |
| TCGA-CR-6482        | 513.891735   |
| TCGA-BA-A6D8        | #N/A         |
| TCGA-CN-5363        | 223.028852   |
| TCGA-CN-4731        | 105.945211   |
| TCGA-CV-5441        | 303.681574   |
| TCGA-CV-5440        | 105.071181   |
| TCGA-CV-5436        | 183.723601   |
| TCGA-CV-5431        | 423.784951   |
| TCGA-CV-6936        | 149.315762   |
| TCGA-CV-6945        | 120.656133   |
| TCGA-CR-6491        | 89.428559    |
| TCGA-CR-6477        | 323.605516   |
| TCGA-CN-4730        | 231.329511   |
| TCGA-CV-7248        | 174.008538   |
| TCGA-CV-6956        | 211.126418   |
| TCGA-CV-7102        | 170.426376   |
| TCGA-CV-7424        | 111.937204   |
| TCGA-CR-7377        | 324.671929   |
| TCGA-CR-7399        | 372.056084   |
| TCGA-CR-7388        | 223.758199   |
| TCGA-BA-7269        | 56.136435    |
| TCGA-CV-7422        | 252.031164   |
| TCGA-CR-5247        | 45.164883    |
| TCGA-CR-7373        | 191.941966   |
| TCGA-F7-A50I        | #N/A         |
| TCGA-CQ-5334        | 93.212831    |
| TCGA-F7-A61W        | #N/A         |

|              |             |
|--------------|-------------|
| TCGA-CN-6016 | 70.569359   |
| TCGA-CV-5442 | 107.09756   |
| TCGA-CV-5443 | 211.000154  |
| TCGA-CV-7435 | 146.280523  |
| TCGA-CN-6989 | 190.979772  |
| TCGA-CR-6478 | 573.891756  |
| TCGA-CN-5364 | 386.388399  |
| TCGA-CN-6998 | 115.201778  |
| TCGA-CR-7379 | 73.279815   |
| TCGA-CN-6022 | 128.226238  |
| TCGA-F7-A620 | #N/A        |
| TCGA-CN-6013 | 193.785719  |
| TCGA-CV-5434 | 191.952242  |
| TCGA-CN-6018 | 292.367967  |
| TCGA-DQ-7589 | 128.668831  |
| TCGA-DQ-7594 | 165.354955  |
| TCGA-CV-7236 | 238.921865  |
| TCGA-DQ-7591 | 839.510595  |
| TCGA-CR-7385 | 1120.533954 |
| TCGA-CV-5430 | 226.676337  |
| TCGA-CN-6024 | 49.551375   |
| TCGA-CR-7404 | 304.087047  |
| TCGA-CV-6934 | 278.502098  |
| TCGA-CV-6959 | 256.715911  |
| TCGA-CN-6996 | 258.186615  |
| TCGA-CV-6939 | 552.672435  |
| TCGA-CN-6994 | 63.62663    |
| TCGA-CN-4726 | 75.420806   |
| TCGA-BA-4075 | #N/A        |
| TCGA-BA-5559 | 376.808761  |
| TCGA-BA-5555 | 240.042868  |
| TCGA-CN-5358 | 294.219965  |
| TCGA-CR-5243 | 262.477422  |
| TCGA-CV-7433 | 163.202901  |
| TCGA-BA-6868 | 74.289075   |
| TCGA-CV-6950 | 52.434178   |
| TCGA-CV-7104 | 111.208536  |
| TCGA-CN-6997 | 102.168699  |
| TCGA-HD-7754 | 67.573428   |
| TCGA-CV-7095 | 125.561698  |
| TCGA-CN-6020 | 282.532532  |
| TCGA-DQ-7593 | 388.586824  |
| TCGA-DQ-7596 | 256.152245  |
| TCGA-CR-7397 | 131.345957  |
| TCGA-CR-7392 | 360.852101  |
| TCGA-CX-7219 | 131.0043    |
| TCGA-CV-7414 | 26.379063   |

|              |            |
|--------------|------------|
| TCGA-CV-7263 | 201.559848 |
| TCGA-CQ-5329 | 103.153356 |
| TCGA-CQ-5330 | 82.341952  |
| TCGA-CQ-5327 | 198.924526 |
| TCGA-BA-A6DD | #N/A       |
| TCGA-CV-7409 | 147.109817 |
| TCGA-CR-6492 | 407.41425  |
| TCGA-CN-6995 | 339.588177 |
| TCGA-F7-A50J | #N/A       |
| TCGA-CN-6012 | 218.415148 |
| TCGA-CQ-5324 | 118.360922 |
| TCGA-CN-6017 | 259.263506 |
| TCGA-DQ-7590 | 609.338217 |
| TCGA-CR-7394 | 389.069099 |
| TCGA-CR-5248 | 520.348241 |
| TCGA-DQ-7588 | 191.764336 |
| TCGA-DQ-7592 | 161.320441 |
| TCGA-CX-7086 | 176.867346 |
| TCGA-F7-A623 | #N/A       |
| TCGA-HD-8314 | 125.008935 |
| TCGA-CQ-5326 | 77.455924  |
| TCGA-CR-6467 | 324.705845 |
| TCGA-CR-6472 | 75.258578  |
| TCGA-BA-5557 | 171.714349 |
| TCGA-BA-5558 | 182.472549 |
| TCGA-CV-7428 | 174.254658 |
| TCGA-CR-7382 | 253.892599 |
| TCGA-CV-7432 | 235.535454 |
| TCGA-CV-6954 | 145.16574  |
| TCGA-CN-6988 | 83.344871  |
| TCGA-CN-6992 | 77.124382  |
| TCGA-CR-6470 | 284.554637 |
| TCGA-CR-6493 | 43.006432  |
| TCGA-BA-6872 | 122.674568 |
| TCGA-CR-6480 | 343.005882 |
| TCGA-BA-4074 | 144.585941 |
| TCGA-CN-5361 | 340.999352 |
| TCGA-CN-5359 | 368.09132  |
| TCGA-CN-5374 | 517.080741 |
| TCGA-BA-4078 | 100.172146 |
| TCGA-CN-5365 | 145.268883 |
| TCGA-CN-4728 | 469.774224 |
| TCGA-MT-A51W | #N/A       |
| TCGA-MT-A51X | #N/A       |
| TCGA-BA-4076 | 98.044129  |
| TCGA-CN-5366 | 136.155245 |
| TCGA-CN-5369 | 312.628619 |

|              |             |
|--------------|-------------|
| TCGA-HD-A4C1 | 73.94964    |
| TCGA-CN-A49B | 211.578519  |
| TCGA-D6-6826 | 120.656921  |
| TCGA-CQ-6229 | 315.341462  |
| TCGA-CQ-6227 | 87.289259   |
| TCGA-CQ-6220 | 219.303627  |
| TCGA-CQ-6219 | 500.901142  |
| TCGA-D6-6824 | 222.9591    |
| TCGA-CQ-6222 | 461.48393   |
| TCGA-CQ-6228 | 55.330093   |
| TCGA-D6-6827 | 1354.108337 |
| TCGA-D6-6823 | 160.681401  |
| TCGA-DQ-5631 | 170.311568  |
| TCGA-DQ-5629 | 104.852923  |
| TCGA-DQ-5624 | 137.770464  |
| TCGA-DQ-5630 | 100.825603  |
| TCGA-D6-6516 | 104.347384  |
| TCGA-BB-4227 | 23.943223   |
| TCGA-CN-4742 | 162.452586  |
| TCGA-BA-5149 | 207.508447  |
| TCGA-D6-A4Z9 | 162.365488  |
| TCGA-HD-7229 | 182.70726   |
| TCGA-CV-7178 | 481.805615  |
| TCGA-CV-7089 | 177.357782  |
| TCGA-CR-7389 | 155.282503  |
| TCGA-CR-7386 | 175.181465  |
| TCGA-CR-7367 | 143.122516  |
| TCGA-CR-7365 | 85.694878   |
| TCGA-BB-4217 | 307.532593  |
| TCGA-CV-5977 | 96.056128   |
| TCGA-CV-5979 | 37.963951   |
| TCGA-CV-5978 | 235.268394  |
| TCGA-CV-5976 | 155.632227  |
| TCGA-CV-5971 | 275.748969  |
| TCGA-CV-5966 | 171.903942  |
| TCGA-CV-5970 | 88.495487   |
| TCGA-CQ-7064 | 81.985763   |
| TCGA-H7-8502 | 54.46137    |
| TCGA-BB-8596 | 110.118089  |
| TCGA-HD-8635 | 232.678718  |
| TCGA-CQ-7063 | 125.122997  |
| TCGA-HD-8634 | 204.545066  |
| TCGA-H7-8501 | 207.416135  |
| TCGA-HD-7832 | 153.766972  |
| TCGA-F7-7848 | 164.556141  |
| TCGA-CN-4735 | 683.869429  |
| TCGA-BB-4225 | 269.958215  |

|              |            |
|--------------|------------|
| TCGA-BB-4223 | 452.573877 |
| TCGA-BA-5153 | 543.966271 |
| TCGA-BB-7871 | 146.933594 |
| TCGA-BB-7870 | 131.128002 |
| TCGA-BB-7866 | 323.792934 |
| TCGA-BB-7862 | 100.295919 |
| TCGA-BB-7864 | 71.003387  |
| TCGA-HL-7533 | 116.653572 |
| TCGA-BB-7872 | 275.052401 |
| TCGA-BB-7861 | 559.710537 |
| TCGA-P3-A5Q5 | #N/A       |
| TCGA-P3-A5QF | #N/A       |
| TCGA-P3-A5QE | #N/A       |



### Node Negative group

| bcr_patient_barcode | hsa-miR-146a |
|---------------------|--------------|
| TCGA-F7-8298        | 72.925749    |
| TCGA-CV-6436        | 117.884732   |
| TCGA-CV-6938        | 317.433805   |
| TCGA-C9-A480        | 136.919867   |
| TCGA-BA-A6DB        | #N/A         |
| TCGA-IQ-A61H        | #N/A         |
| TCGA-IQ-A61E        | #N/A         |
| TCGA-CR-6471        | 188.583433   |
| TCGA-CN-5373        | 146.914012   |
| TCGA-CN-5360        | 362.49953    |
| TCGA-CV-5444        | 212.584384   |
| TCGA-CR-5249        | 800.740572   |
| TCGA-CV-7438        | 280.295951   |
| TCGA-CR-7383        | 186.816823   |
| TCGA-CV-6952        | 183.219357   |
| TCGA-CV-6940        | 109.527988   |
| TCGA-CQ-5333        | 296.916468   |
| TCGA-CR-7370        | 57.692743    |
| TCGA-CV-6962        | 118.630688   |
| TCGA-CV-6943        | 195.741626   |
| TCGA-CN-5355        | 113.137321   |
| TCGA-CN-4729        | 476.947392   |
| TCGA-CN-5367        | 235.090603   |
| TCGA-CN-5356        | 212.673093   |
| TCGA-CV-7097        | 241.595567   |
| TCGA-CV-7101        | 236.650996   |
| TCGA-CV-7238        | 282.182157   |
| TCGA-CV-7425        | 555.121507   |
| TCGA-CV-7427        | 255.324226   |
| TCGA-CV-7416        | 150.779146   |
| TCGA-CV-7415        | 114.973413   |
| TCGA-CV-7253        | 37.96632     |
| TCGA-CV-6960        | 160.119126   |
| TCGA-CX-7085        | 198.492307   |
| TCGA-CV-5435        | 42.148361    |
| TCGA-CN-6023        | 263.892477   |
| TCGA-CN-6021        | 142.610915   |
| TCGA-CV-7568        | 66.701619    |
| TCGA-CV-7429        | 95.602569    |
| TCGA-CV-6941        | 101.892332   |
| TCGA-CN-4722        | 202.478143   |
| TCGA-CV-7254        | 1202.264843  |
| TCGA-CR-7395        | 232.803306   |
| TCGA-CV-5439        | 260.049518   |

|              |            |
|--------------|------------|
| TCGA-CV-7235 | 889.589848 |
| TCGA-CR-7372 | 85.792484  |
| TCGA-CV-7255 | 416.946383 |
| TCGA-CV-7418 | 80.751546  |
| TCGA-CR-7401 | 140.400497 |
| TCGA-CN-5370 | 110.91965  |
| TCGA-CV-7407 | 215.522849 |
| TCGA-CV-7421 | 85.176783  |
| TCGA-CR-7374 | 219.574573 |
| TCGA-CQ-5325 | 386.721341 |
| TCGA-D6-8568 | 152.880938 |
| TCGA-BB-8601 | 35.516371  |
| TCGA-HD-8224 | 33.297366  |
| TCGA-CV-7430 | 57.104797  |
| TCGA-CV-6953 | 190.973833 |
| TCGA-CV-6961 | 35.435729  |
| TCGA-CR-6484 | 158.68964  |
| TCGA-BA-6869 | 322.264183 |
| TCGA-BA-5556 | 396.390766 |
| TCGA-CR-5250 | 328.525344 |
| TCGA-CR-7376 | 219.696468 |
| TCGA-CV-7446 | 47.687344  |
| TCGA-CV-6933 | 328.370206 |
| TCGA-CR-7390 | 140.88121  |
| TCGA-CR-7398 | 112.521326 |
| TCGA-CR-7391 | 341.018343 |
| TCGA-CV-7250 | 138.642893 |
| TCGA-CV-7410 | 273.928134 |
| TCGA-CV-7247 | 121.240789 |
| TCGA-CV-7413 | 131.5283   |
| TCGA-CV-7252 | 112.342497 |
| TCGA-CN-6019 | 619.959064 |
| TCGA-CQ-5323 | 216.189978 |
| TCGA-CN-6011 | 115.577523 |
| TCGA-CV-7099 | 380.835863 |
| TCGA-CR-7380 | 128.778186 |
| TCGA-CV-7245 | 112.376736 |
| TCGA-CR-6488 | 136.598963 |
| TCGA-IQ-7632 | 168.748174 |
| TCGA-CV-6942 | 353.920916 |
| TCGA-CR-7402 | 246.567762 |
| TCGA-CX-7082 | 220.377078 |
| TCGA-HD-7753 | 150.988219 |
| TCGA-CV-7411 | 168.929143 |
| TCGA-IQ-7630 | 237.985446 |
| TCGA-CV-7261 | 156.769613 |
| TCGA-CV-7091 | 120.199014 |

|              |            |
|--------------|------------|
| TCGA-CQ-5332 | 70.877908  |
| TCGA-CV-5432 | 129.103043 |
| TCGA-CV-6433 | 623.938945 |
| TCGA-D6-8569 | 199.931452 |
| TCGA-DQ-7595 | 185.763779 |
| TCGA-CV-7103 | 182.321386 |
| TCGA-CR-7393 | 307.374351 |
| TCGA-CV-6937 | 149.402772 |
| TCGA-CV-7242 | 271.309959 |
| TCGA-CV-7406 | 103.415984 |
| TCGA-IQ-7631 | 9.426839   |
| TCGA-CV-6955 | 298.004749 |
| TCGA-CV-7100 | 78.019919  |
| TCGA-CV-7090 | 270.239157 |
| TCGA-CV-6003 | 114.365252 |
| TCGA-CN-6010 | 142.711713 |
| TCGA-CR-7371 | 226.861626 |
| TCGA-CV-7423 | 134.348989 |
| TCGA-CV-7243 | 69.258781  |
| TCGA-CV-6441 | 159.532248 |
| TCGA-BA-A6DE | #N/A       |
| TCGA-F7-8489 | 220.312975 |
| TCGA-CR-6487 | 327.350047 |
| TCGA-CV-7440 | 169.713168 |
| TCGA-CV-7437 | 240.395329 |
| TCGA-CV-7434 | 339.201541 |
| TCGA-CV-6935 | 110.994004 |
| TCGA-CV-6948 | 88.064455  |
| TCGA-CQ-5331 | 351.738909 |
| TCGA-CN-4723 | 310.504995 |
| TCGA-CN-4725 | 89.807373  |
| TCGA-CN-4727 | 242.466603 |
| TCGA-CQ-6225 | 57.80891   |
| TCGA-CQ-6223 | 166.688126 |
| TCGA-CQ-6218 | 161.104923 |
| TCGA-D6-6825 | 247.021917 |
| TCGA-CQ-6224 | 69.350806  |
| TCGA-BA-5152 | 631.609232 |
| TCGA-DQ-5625 | 106.458022 |
| TCGA-D6-6517 | 220.940955 |
| TCGA-D6-6515 | 317.356789 |
| TCGA-CN-4733 | 289.702104 |
| TCGA-CN-4738 | 254.287346 |
| TCGA-CN-4739 | 434.852353 |
| TCGA-D6-A4ZB | 186.485982 |
| TCGA-CR-7364 | 116.255161 |
| TCGA-CV-7183 | 87.069539  |

|              |            |
|--------------|------------|
| TCGA-CV-7177 | 112.674656 |
| TCGA-CV-7180 | 182.869117 |
| TCGA-H7-7774 | 295.608723 |
| TCGA-CQ-7068 | 181.791608 |
| TCGA-CQ-6221 | 480.55317  |
| TCGA-CQ-7065 | 23.8474    |
| TCGA-CV-5973 | 24.400472  |
| TCGA-CQ-7069 | 27.764594  |
| TCGA-HD-7831 | 95.771431  |
| TCGA-CR-7369 | 143.038792 |
| TCGA-CR-7368 | 213.989357 |
| TCGA-CN-4734 | #N/A       |
| TCGA-CN-4737 | 79.848209  |
| TCGA-CN-4736 | 326.181646 |
| TCGA-BB-4228 | 110.911183 |
| TCGA-CN-4741 | 415.204395 |
| TCGA-CN-4740 | 223.561348 |
| TCGA-BB-4224 | 53.407918  |
| TCGA-BA-5151 | 188.891666 |
| TCGA-HD-7917 | 101.231353 |
| TCGA-CQ-7067 | 86.701001  |
| TCGA-BB-7863 | 83.382842  |
| TCGA-P3-A5QA | #N/A       |
| TCGA-P3-A5Q6 | #N/A       |

## ChIP Primers

Endogeneous miR-146a promoter

146A\_P2\_F:                   CCCAAGTAGCTGGGACTACA  
146A\_P2\_R:                   TAGGCGAGATGTGGTGACTC

Luciferase miR-146a promoter

TBS-chip\_F                   CTTGAATGTTCACATTTCCAGAG  
TBS-chip\_R                   GGCAGAAAGCTCCCTTGTTTC
